# Supplementary material for: AlCl3@ZnO nanostructured material: an efficient green catalyst for the one-pot solvent-free synthesis of 1,4-dihydropyridines
Source: Royal Society of Chemistry journal article supplement (doi:10.1039/d3ra04277d), 2023-01-01
Supplement: d3ra04277d1.pdf [file d3ra04277d1.pdf]

## Electronic Supplementary Information (ESI)

### **AlCl<sub>3</sub>@ZnO nanostructured material: an efficient green catalyst to one-pot solvent-free synthesis of 1, 4 dihydropyridines**

Santosh T. Shinde\*<sup>a</sup>, Kaluram G. Kanade\*<sup>a</sup>, Ramesh B. Gawade<sup>a</sup>, Vikram B. Hinge<sup>a</sup>, Manish D. Shinde<sup>b</sup>, Digambar B. Bankar<sup>c</sup>, Nitin M. Thorat<sup>d</sup> and Dinesh P. Amalnerkar<sup>e</sup>

<sup>a</sup>Post Graduate Department of Chemistry and Research Centre, Annasaheb Awate College Manchar-410503, India.

<sup>b</sup>Centre for Materials for Electronic Technology (C-MET), Off Pashan Road, Panchwati, Pune-411008, India.

<sup>c</sup>Post Graduate Department of Chemistry and Research Centre, R. B. Narayanrao Borawake College, Shrirampur-413709, India.

<sup>d</sup>Post Graduate Department of Chemistry and Research Centre, Maharaja Jivajirao Shinde Mahavidyalaya, Shrigonda, Ahmednagar-413701, India.

<sup>e</sup>Department of technology Savitribai Phule Pune University, Pune -411007, India.

\*Corresponding Authors:

**Dr. Santosh T. Shinde**

Email: [drsantoshinde@gmail.com](mailto:drsantoshinde@gmail.com)

**Dr. K. G. Kanade**

Email: [kgkanade@yahoo.co.in](mailto:kgkanade@yahoo.co.in)

---

## Contents

- I. Table 6 (Page No. 3)
- II. References for MP (Page No. 4)
- III. Characterization data of as-synthesized 1, 4 dihydropyridines derivatives (Page No. 5 to 13)
- IV. FT-IR,  $^1\text{H}$  NMR,  $\text{D}_2\text{O}$  exchange  $^1\text{H}$  NMR,  $^{13}\text{C}$  NMR and HRMS spectra of 1, 4 dihydropyridines derivatives (Page No. 4 to 56)

**Table 6: Synthesis of 1, 4 dihydropyridine (4a–n) using 20% AlCl<sub>3</sub>@ZnO catalyst at solvent free condition.**

| Entry | Ar<br>1(a-n)                                    | Compound<br>4(a-n) | Yield* | Melting<br>Point (°C)[ref.] |          |
|-------|-------------------------------------------------|--------------------|--------|-----------------------------|----------|
|       |                                                 |                    |        | Reported                    | Observed |
| 1     | C <sub>6</sub> H <sub>5</sub>                   | 4a                 | 92     | 158-160 <sup>1</sup>        | 158      |
| 2     | 4-ClC <sub>6</sub> H <sub>4</sub>               | 4b                 | 93     | 147-148 <sup>1</sup>        | 146      |
| 3     | 4-FC <sub>6</sub> H <sub>4</sub>                | 4c                 | 90     | 155-157 <sup>2</sup>        | 154      |
| 4     | 4-BrC <sub>6</sub> H <sub>4</sub>               | 4d                 | 88     | 158-160 <sup>3</sup>        | 160      |
| 5     | 4-OMeC <sub>6</sub> H <sub>4</sub>              | 4e                 | 92     | 161-163 <sup>1</sup>        | 162      |
| 6     | 4-NO <sub>2</sub> C <sub>6</sub> H <sub>4</sub> | 4f                 | 80     | 129-131 <sup>1</sup>        | 128      |
| 7     | 2-NO <sub>2</sub> C <sub>6</sub> H <sub>4</sub> | 4g                 | 75     | -                           | 168      |
| 8     | 4-OHC <sub>6</sub> H <sub>4</sub>               | 4h                 | 78     | 226-228 <sup>3</sup>        | 130      |
| 9     | 2-Cl, 6-FC <sub>6</sub> H <sub>3</sub>          | 4i                 | 78     | -                           | 142      |
| 10    | 2-ClC <sub>6</sub> H <sub>4</sub>               | 4j                 | 86     | 80-82 <sup>3</sup>          | 82       |
| 11    | 3-ClC <sub>6</sub> H <sub>4</sub>               | 4k                 | 88     | 245-147 <sup>2</sup>        | 148      |
| 12    | 2-FC <sub>6</sub> H <sub>4</sub>                | 4l                 | 88     | 155-157 <sup>2</sup>        | 154      |
| 13    | 4-CH <sub>3</sub> C <sub>6</sub> H <sub>4</sub> | 4m                 | 84     | 162-164 <sup>3</sup>        | 162      |
| 14    | 3-CH <sub>3</sub> C <sub>6</sub> H <sub>4</sub> | 4n                 | 82     | 122-124 <sup>4</sup>        | 122      |

**Reaction conditions:** 1(a-n) substituted benzaldehydes (4.71 mmol), 2 Ethyl acetoacetate (9.42 mmol), 3 ammonium acetate (5.66 mmol), and 20% AlCl<sub>3</sub>@ZnO (1.17 mmol) under solvent-free conditions, room temperature, 2 h.

\*Isolated Yield.

## References

- 1 Abdolhamid Bamoniri and Sara Fouladgar, *RSC Adv*, 2014, DOI:10.1039/x0xx00000x.
- 2 A. Kuraitheerthakumaran, S. Pazhamalai and M. Gopalakrishnan, *Chinese Chemical Letters*, 2011, **22**, 1199–1202.
- 3 A. Teimouri, L. Ghorbanian and A. Moatari, *Bull Chem Soc Ethiop*, 2013, **27**, 427–437.
- 4 A. Debache, R. Boulcina, A. Belfaitah, S. Rhouati and B. Carboni, *Synlett*, 2008, 509–512.

I. Spectral data of as-synthesized 1, 4 dihydropyridines derivatives (Table 3, entries 1 to 9)

2, 6-Dimethyl-4-phenyl-1,4-dihydropyridine-3,5-diethylcarboxylate [Compound (a) Entry 1, Table 6].

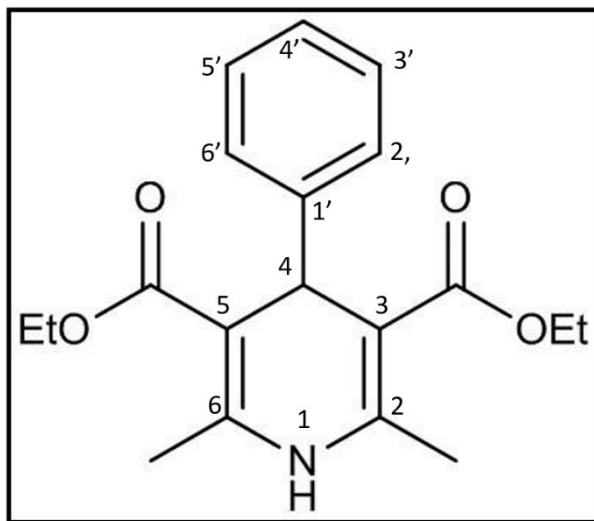

White solid; FT-IR 3338, 2981, 1683, 1653, 1558, 1207  $\text{cm}^{-1}$ ;  $^1\text{H-NMR}$  ( $\text{CDCl}_3$ )  $\delta$  1.22 (t,  $J = 7.0$  Hz, 6H, 2,  $\text{OCH}_2\text{-CH}_3$ ), 2.33 (s, 6H, 2,  $\text{CH}_3$ ), 4.08 (q,  $J = 7.0$  Hz, 4H, 2,  $\text{OCH}_2\text{-CH}_3$ ), 4.99 (s, 1H, CH), 5.64 (s, 1H, NH), 7.13 (t,  $J = 2.0$  and 8.6 Hz, 1H, H-4'), 7.21 (t,  $J = 2$  and 8.6 Hz, 2H, H-2' & H-6'), 7.27 (t,  $J = 8.6$  Hz, 2H, H-3' & H-5') ppm;  $^{13}\text{C-NMR}$  ( $\text{CDCl}_3$ )  $\delta$  14.26 (2,  $\text{OCH}_2\text{-CH}_3$ ), 19.63 (2,  $\text{CH}_3$ ), 39.63 (C-4), 59.74 (2,  $\text{OCH}_2\text{-CH}_3$ ), 104.21 (C-3 & C-5), 126.11 (C-4'), 127.84 (C-2' & C-6'), 128.03 (C-3' & C-5'), 143.82 (C-2 & C-6), 147.76 (C-1'), 167.64 (2, C=O) ppm; HRMS  $m/z$  Calcd. for  $\text{C}_{19}\text{H}_{24}\text{NO}_4$  [ $\text{M}+\text{H}$ ]: 330.1705, Found: 330.1703.

**2, 6-Dimethyl-4-(4-chlorophenyl)-1, 4-dihydropyridine-3, 5-diethylcarboxylate [Compound (b) Entry 2, Table 6].**

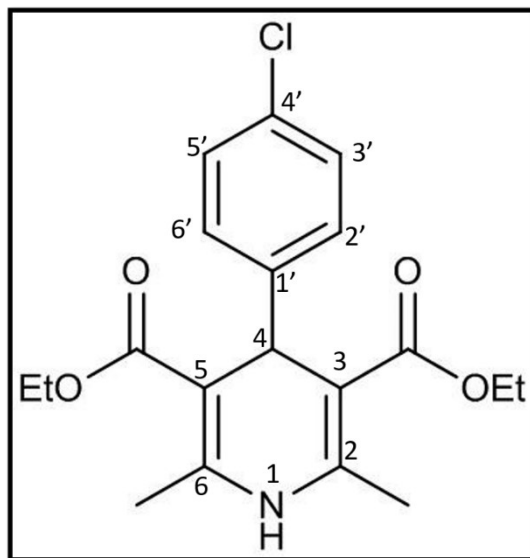

White solid; FT-IR 3354, 2981, 1693, 1651, 1485, 1209, 829  $\text{cm}^{-1}$ ;  $^1\text{H-NMR}$  ( $\text{CDCl}_3$ )  $\delta$  1.23 (t,  $J = 7.0$  Hz, 6H, 2,  $\text{OCH}_2\text{-CH}_3$ ), 2.32 (s, 6H, 2,  $\text{CH}_3$ ), 4.08 (q,  $J = 7.0$  Hz, 4H, 2,  $\text{OCH}_2\text{-CH}_3$ ), 4.95 (s, 1H, CH), 5.68 (s, 1H, NH), 7.17 (d,  $J = 8.0$  Hz, 2H, H-2' & H-6'), 7.22 (d,  $J = 8.0$  Hz, 2H, H-3' & H-5') ppm;  $^{13}\text{C-NMR}$  ( $\text{CDCl}_3$ )  $\delta$  14.27 (2,  $\text{OCH}_2\text{-CH}_3$ ), 19.63 (2,  $\text{CH}_3$ ), 39.26 (C-4), 59.84 (2,  $\text{OCH}_2\text{-CH}_3$ ), 103.90 (C-3 & C-5), 127.95 (C-3' & C-5'), 129.44 (C-2' & C-6'), 131.70 (C-4'), 143.99 (C-2 & C-6), 146.34 (C-1'), 167.44 (2, C=O) ppm; HRMS  $m/z$  Calcd. for  $\text{C}_{19}\text{H}_{23}\text{NO}_4\text{Cl}$  [M+H]: 364.1316, Found: 364.1310.

**2,6-Dimethyl-4-(4-fluorophenyl)-1,4-dihydropyridine-3,5-diethylcarboxylate [Compound**

**(c) Entry 3, Table 6]**

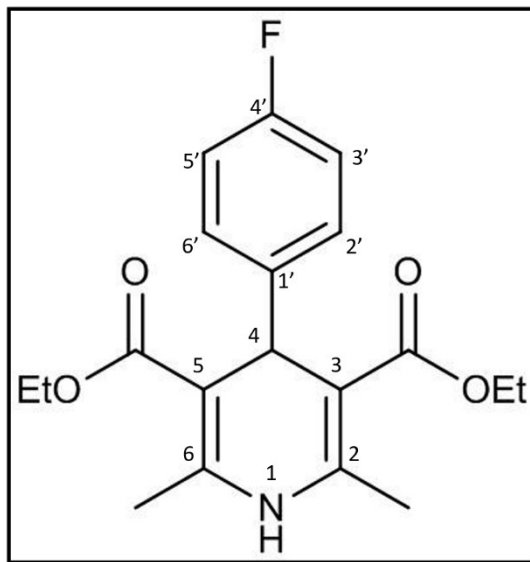

White solid; FT-IR 3340, 2981, 1685, 1649, 1506, 1207  $\text{cm}^{-1}$ ;  $^1\text{H-NMR}$  ( $\text{CDCl}_3$ )  $\delta$  1.22 (t,  $J = 7.2$  Hz, 6H, 2,  $\text{OCH}_2\text{-CH}_3$ ), 2.33 (s, 6H, 2,  $\text{CH}_3$ ), 4.10 (q,  $J = 7.2$  Hz, 4H, 2,  $\text{OCH}_2\text{-CH}_3$ ), 4.96 (s, 1H, CH), 5.66 (s, 1H, NH), 6.88 (t,  $J = 8.0$  Hz, 2H, H-3' & 5'), 7.21 (dd,  $J = 1.5$  and 8.0 Hz, 2H, H-2' & 6') ppm;  $^{13}\text{C-NMR}$  ( $\text{CDCl}_3$ )  $\delta$  14.27 (2,  $\text{OCH}_2\text{-CH}_3$ ), 19.622 (2,  $\text{CH}_3$ ), 39.05 (C-4), 59.79 (2,  $\text{OCH}_2\text{-CH}_3$ ), 104.19 (C-3 & C-5), 114.50 (d,  $J = 21.2$  Hz, C-3' & C-5'), 129.46 (d,  $J = 7.5$  Hz, C-2' & C-6'), 143.67 (d,  $J = 2.5$  Hz, C-1'), 143.80 (C-2 & C-6), 161.36 (d,  $J = 242.5$  Hz, C-4'), 167.53 (2, C=O) ppm; HRMS  $m/z$  Calcd. for  $\text{C}_{19}\text{H}_{23}\text{NO}_4\text{F}$  [ $\text{M}+\text{H}$ ]: 348.1611 Found: 348.1605.

**2, 6-Dimethyl-4-(4-bromophenyl)-1, 4-dihydropyridine-3, 5-diethylcarboxylate [Compound (d) Entry 4, Table 6]**

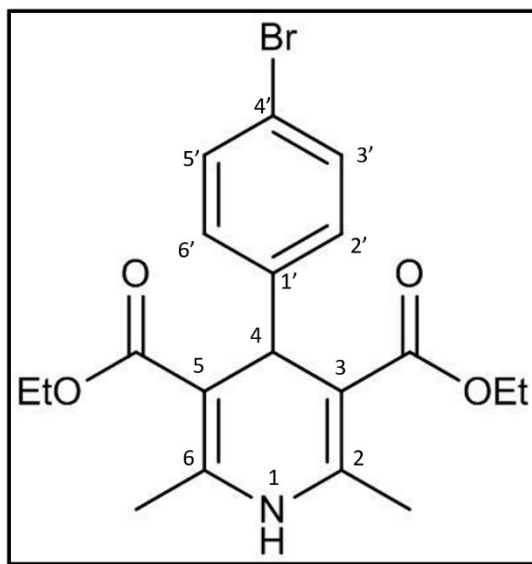

White solid; FT-IR 3358, 2981, 1689, 1647, 1481, 1209, 1116  $\text{cm}^{-1}$ ;  $^1\text{H-NMR}$  ( $\text{CDCl}_3$ )  $\delta$  1.24 (t,  $J = 7.2$  Hz, 6H, 2,  $\text{OCH}_2\text{-CH}_3$ ), 2.32 (s, 6H, 2,  $\text{CH}_3$ ), 4.07 (q,  $J = 7.2$  Hz, 4H, 2,  $\text{OCH}_2\text{-CH}_3$ ), 4.94 (s, 1H, CH), 5.69 (s, 1H, NH), 7.15 (d,  $J = 8.0$  Hz, 2H, H-2 & H-6), 7.32 (d,  $J = 8.0$  Hz, 2H, H-3 & H-5) ppm;  $^{13}\text{C-NMR}$  ( $\text{CDCl}_3$ )  $\delta$  14.28 (2,  $\text{OCH}_2\text{-CH}_3$ ), 19.63 (2,  $\text{CH}_3$ ), 39.34 (C-4), 59.85 (2,  $\text{OCH}_2\text{-CH}_3$ ), 103.82 (C-3 & C-5), 119.89 (C-4'), 129.85 (C-2' & C-6'), 130.90 (C-3' & C-5'), 144.02 (C-2 & C-6), 146.83 (C-1'), 167.42 (2, C=O) ppm; HRMS  $m/z$  Calcd. for  $\text{C}_{19}\text{H}_{23}\text{NO}_4\text{Br}$  [M+H]: 408.0810, Found: 408.0807.



**2,6-Dimethyl-4-(4-methoxyphenyl)-1,4-dihydropyridine-3,5-diethylcarboxylate [Compound**

**(e) Entry 5, Table 6]**

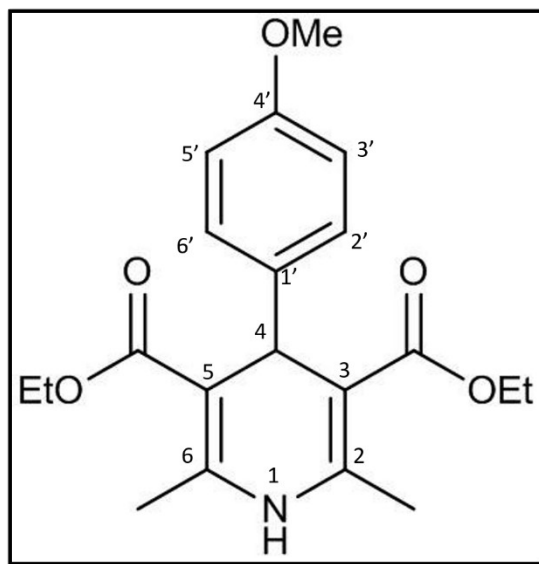

White solid; FT-IR 3340, 2982, 1688, 1646, 1206, 1116, 1024, 832  $\text{cm}^{-1}$ ;  $^1\text{H-NMR}$  ( $\text{CDCl}_3$ )  $\delta$  1.22 (t,  $J = 7.0$  Hz, 6H, 2, O-CH<sub>2</sub>-CH<sub>3</sub>), 2.31 (s, 6H, 2, CH<sub>3</sub>), 3.748 (s, 3H, OCH<sub>3</sub>), 4.09 (q,  $J = 7.0$  Hz, 4H, 2, OCH<sub>2</sub>-CH<sub>3</sub>), 4.93 (s, 1H, CH), 5.76 (s, 1H, NH), 6.75 (d,  $J = 8.0$  Hz, 2H, H-3' & H-5'), 7.20 (d,  $J = 8.0$  Hz, 2H, H-2' & H-6') ppm;  $^{13}\text{C-NMR}$  ( $\text{CDCl}_3$ )  $\delta$  14.29 (2, OCH<sub>2</sub>-CH<sub>3</sub>), 19.56 (2, CH<sub>3</sub>), 39.04 (C-4), 55.15 (OCH<sub>3</sub>), 59.72 (2, OCH<sub>2</sub>-CH<sub>3</sub>), 104.34 (C-3 & C-5), 113.31 (C-3' & C-5'), 128.97 (C-2' & C-6'), 140.37 (C-1'), 143.67 (C-2 & C-6), 157.88 (C-4'), 167.75 (2, C=O) ppm; HRMS  $m/z$  Calcd. for  $\text{C}_{20}\text{H}_{26}\text{NO}_5[\text{M}+\text{H}]$ : 360.1811, Found: 360.1807.

**2, 6-Dimethyl-4-(4-nitrophenyl)-1, 4-dihydropyridine-3, 5-diethylcarboxylate [Compound (f) Entry 6, Table 6]**

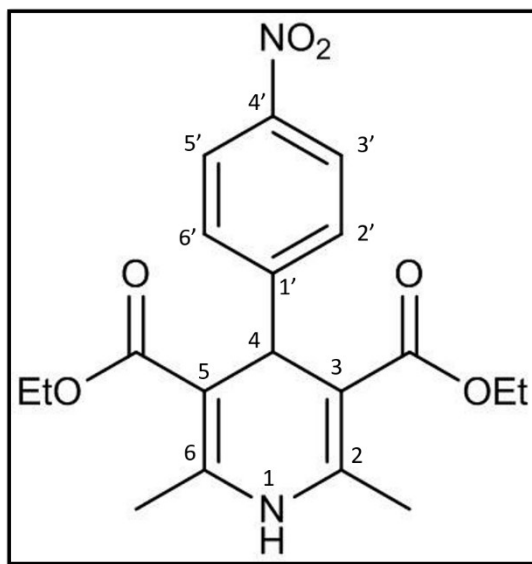

Yellow solid; FT-IR 3307, 2981, 1687, 1598, 1479, 1211, 856  $\text{cm}^{-1}$ ;  $^1\text{H-NMR}$  ( $\text{CDCl}_3$ )  $\delta$  1.21 (t,  $J = 7.0$  Hz, 6H, 2,  $\text{OCH}_2\text{-CH}_3$ ), 2.36 (s, 6H, 2,  $\text{CH}_3$ ), 4.10 (q,  $J = 7.0$  Hz, 4H, 2,  $\text{CH}_2\text{-CH}_3$ ), 5.09 (s, 1H, CH), 5.70 (s, 1H, NH), 7.45 (d,  $J = 8.0$  Hz, 2H, H-2' & H-6'), 8.08 (d,  $J = 8.0$  Hz, 2H, H-3' & H-5') ppm;  $^{13}\text{C-NMR}$  ( $\text{CDCl}_3$ )  $\delta$  14.27(2,  $\text{OCH}_2\text{-CH}_3$ ), 19.72 (2,  $\text{CH}_3$ ), 40.14 (C-4), 60.03 (2,  $\text{OCH}_2\text{-CH}_3$ ), 103.27 (C-3 & C-5), 123.31 (C-3' & C-5'), 128.92 (C-2' & C-6'), 144.57 (C-2 & C-6), 146.36 (C-1'), 155.08 (C-4'), 167.05 (2, C=O) ppm; HRMS  $m/z$  Calcd. for  $\text{C}_{19}\text{H}_{23}\text{N}_2\text{O}_6$  [M+H]: 375.1556, Found: 375.1551.

**2, 6-Dimethyl-4-(2-nitrophenyl)-1, 4-dihydropyridine-3, 5-diethylcarboxylate [Compound (g) Entry 7, Table 6]**

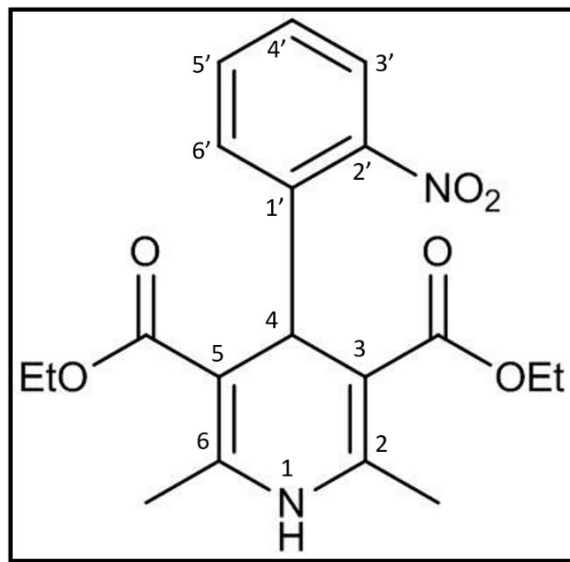

Yellow solid; FT-IR 3331, 2983, 1693, 1670, 1525, 1487, 1352, 1207, 756  $\text{cm}^{-1}$ ;  $^1\text{H-NMR}$  ( $\text{CDCl}_3$ )  $\delta$  1.16 (t,  $J = 7.0$  Hz, 6H, 2,  $\text{OCH}_2\text{-CH}_3$ ), 2.33 (s, 6H, 2,  $\text{CH}_3$ ), 4.00 (q,  $J = 7.0$  Hz, 2H,  $\text{OCH}_2\text{-CH}_3$ ), 4.12 (q,  $J = 7.0$  Hz, 2H,  $\text{OCH}_2\text{-CH}_3$ ), 5.60 (s, 1H, CH), 5.85 (s, 1H, NH), 7.25 (dd,  $J = 2.0$  and 8.0 Hz, 1H, H-6'), 7.46 (dt,  $J = 2$  and 8.0 Hz, 1H, H-4'), 7.54 (dd,  $J = 2$  and 8.0 Hz, 1H, 5'), 7.74 (dd,  $J = 2$  and 8.0 Hz, 1H, H-3') ppm;  $^{13}\text{C-NMR}$  ( $\text{CDCl}_3$ )  $\delta$  14.15 (2,  $\text{OCH}_2\text{-CH}_3$ ), 19.73 (2,  $\text{CH}_3$ ), 34.67 (C-4), 60.07 (2,  $\text{OCH}_2\text{-CH}_3$ ), 104.08 (C-3 & C-5), 124.03 (C-3'), 126.95 (C-4'), 131.36 (C-6'), 132.77 (C-5'), 142.58 (C-1'), 144.37 (C-2 & C-6), 147.82 (C-2'), 167.22 (2, C=O) ppm; HRMS  $m/z$  Calcd. for  $\text{C}_{19}\text{H}_{23}\text{N}_2\text{O}_6$  [ $\text{M}+\text{H}$ ]: 375.1556, Found: 375.1550.

**2,6-Dimethyl-4-(4-hydroxyphenyl)-1,4-dihydropyridine-3,5-diethylcarboxylate [Compound**

**(h) Entry 8, Table 6]**

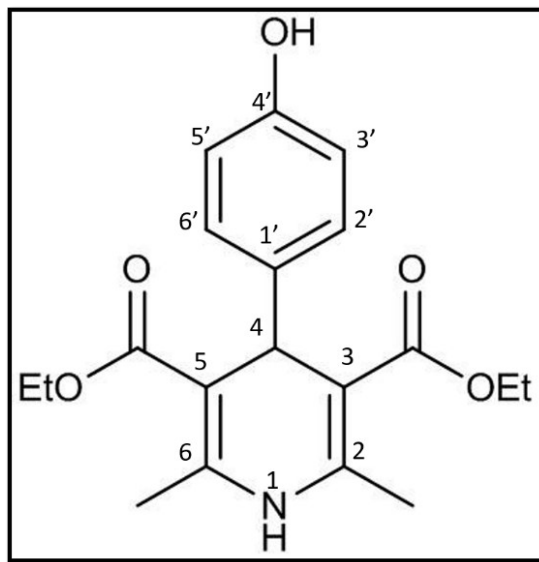

Off-white solid; FT-IR 3342, 1656, 1633, 1487, 1222, 840  $\text{cm}^{-1}$ ;  $^1\text{H-NMR}$  ( $\text{CDCl}_3$ )  $\delta$  1.22 (t,  $J = 7.0$  Hz, 6H, 2,  $\text{OCH}_2\text{-CH}_3$ ), 2.32 (s, 6H, 2,  $\text{CH}_3$ ), 4.09 (q,  $J = 7.0$  Hz, 4H, 2,  $\text{OCH}_2\text{-CH}_3$ ), 4.91 (s, 1H, CH), 5.51 (s, 1H, NH), 6.66 (d,  $J = 8.0$  Hz, 2H, H-3' & H-5'), 7.13 (d,  $J = 8.0$  Hz, 2H, H-2' & H-6') ppm;  $^{13}\text{C-NMR}$  ( $\text{CDCl}_3$ )  $\delta$  14.28 (2,  $\text{OCH}_2\text{-CH}_3$ ), 19.37 (2,  $\text{CH}_3$ ), 38.79 (C-4), 59.74 (2,  $\text{OCH}_2\text{-CH}_3$ ), 104.08 (C-3 & C-5), 114.03 (C-3' & C-5'), 129.23 (C-2' & C-6'), 137.36 (C-1'), 143.26 (C-2 & C-6), 155.50 (C-4'), 167.70 (2, C=O) ppm; HRMS  $m/z$  Calcd. for  $\text{C}_{19}\text{H}_{24}\text{NO}_5$  [M+H]: 346.1654, Found: 346.1653.

**2,6-Dimethyl-4-(2-chloro-6-fluorophenyl)-1,4-dihydropyridine-3,5-diethylcarboxylate**

[Compound (i) Entry 9, Table 6]

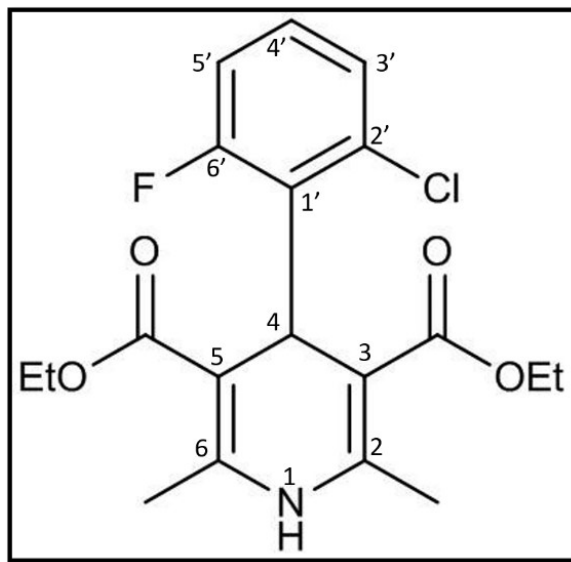

Pale yellow solid; FT-IR 3330, 2984, 1691, 1673, 1487, 1222, 892, 787  $\text{cm}^{-1}$ ;  $^1\text{H-NMR}$  ( $\text{CDCl}_3$ )  $\delta$  1.15 (t,  $J = 7.0$  Hz, 6H, 2,  $\text{OCH}_2\text{-CH}_3$ ), 2.27 (s, 6H, 2,  $\text{CH}_3$ ), 4.04 (q,  $J = 7.0$  Hz, 4H, 2,  $\text{OCH}_2\text{-CH}_3$ ), 5.66 (s, 1H, CH), 5.76 (s, 1H, NH), 6.87 (dt,  $J = 9.5$  Hz & 1.15 Hz, 1H, H-4'), 7.03 (m, 1H, H-5'), 7.09 (d,  $J = 8.0$  Hz, 1H, H-3') ppm;  $^{13}\text{C-NMR}$  ( $\text{CDCl}_3$ )  $\delta$  14.12 (2,  $\text{OCH}_2\text{-CH}_3$ ), 19.60 (2,  $\text{CH}_3$ ), 33.68 (C-4), 59.63 (2,  $\text{OCH}_2\text{-CH}_3$ ), 100.12 (C-3 & C-5), 113.96 (d,  $J = 31.3$  Hz, C-5'), 125.77 (d,  $J = 3.7$  Hz, C-3'), 127.47 (d,  $J = 12.5$  Hz, C-4'), 131.57 (d,  $J = 18.7$  Hz, C-1'), 135.54 (d,  $J = 7.5$  Hz, C-2'), 145.34 (C-2 & C-6), 162.60 (d,  $J = 310.0$  Hz, C-6'), 167.64 (2, C=O) ppm; HRMS  $m/z$  Calcd. for  $\text{C}_{19}\text{H}_{22}\text{NO}_5\text{ClF}$  [ $\text{M}+\text{H}$ ]: 382.1221, Found: 382.1217.

II. FT-IR, <sup>1</sup>H-NMR, D<sub>2</sub>O exchange <sup>1</sup>H-NMR, <sup>13</sup>C NMR and HRMS spectra of  
1, 4 dihydropyridines derivatives (Table 6, Entries 1 to 9)

FTIR (Table 6, Entry 1)

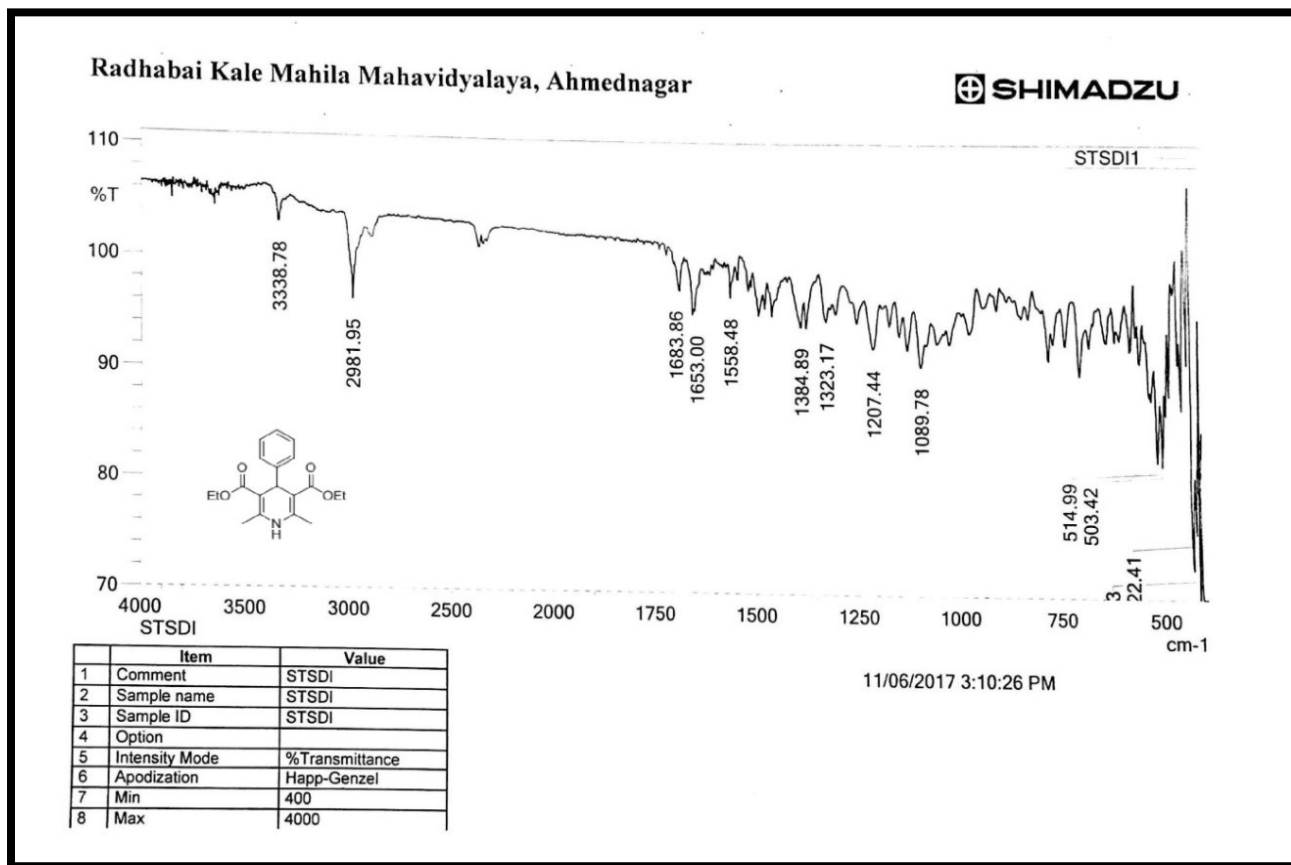

# <sup>1</sup>H-NMR spectra (Table 6, Entry 1)

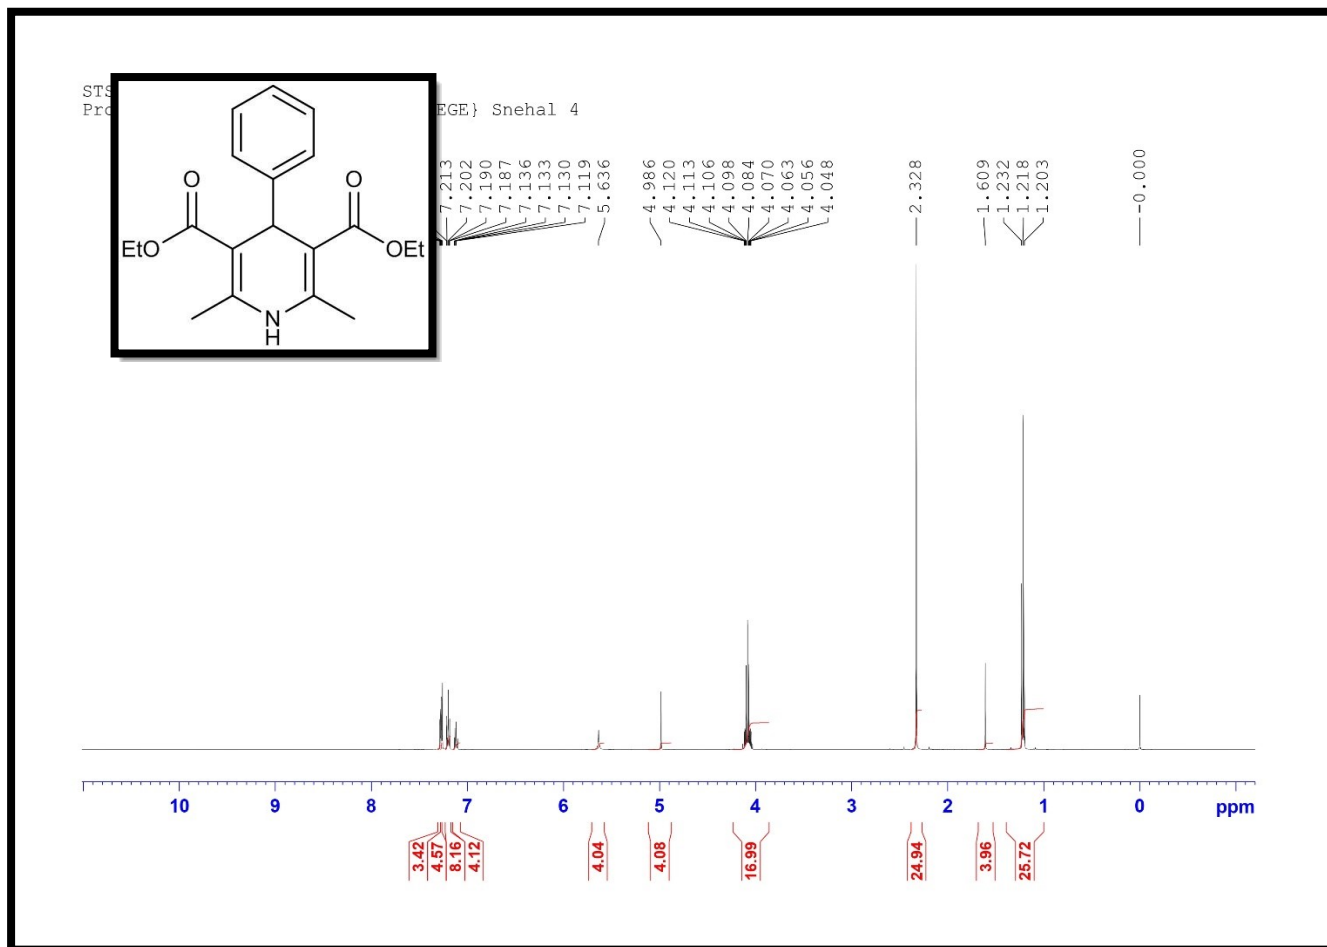

# <sup>1</sup>H-NMR spectra without D<sub>2</sub>O exchange (Table 6, Entry 1)

STSD-I  
CIF\_Proton CDC13 {E:\AWATE COLLEGE} CIF 15

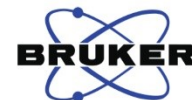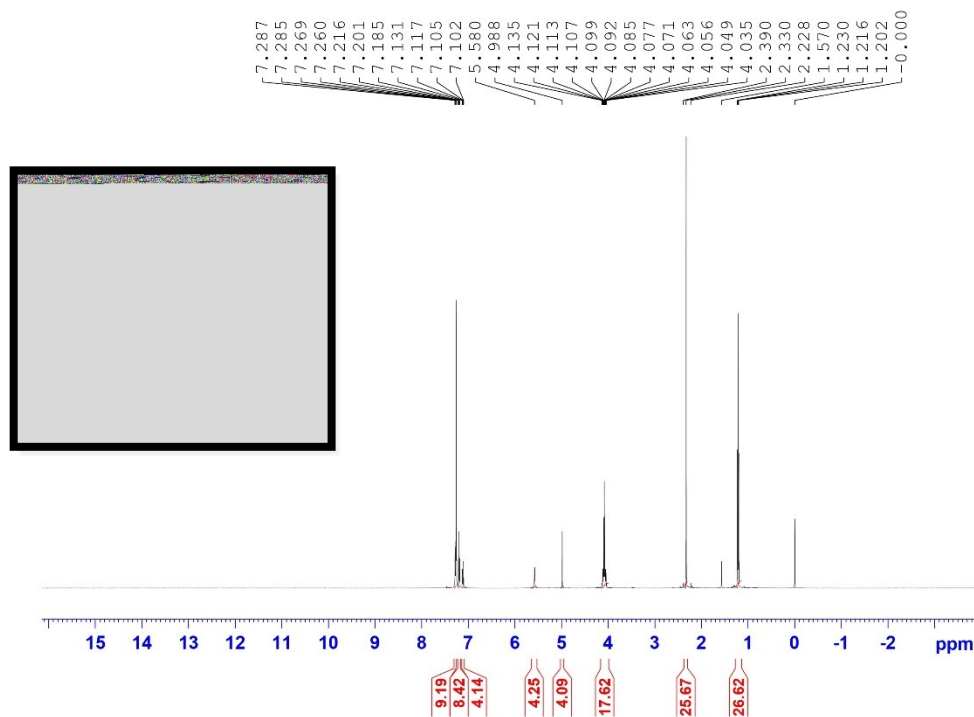

Current Data Parameters  
NAME Jul22-2023  
EXPNO 1  
PROCNO 1

F2 - Acquisition Parameters  
Date\_ 20230722  
Time 16.01 h  
INSTRUM spect  
PROBHD z119470\_0152 (4  
PULPROG zg30  
TD 65536  
SOLVENT CDC13  
NS 40  
DS 2  
SWH 10000.000 Hz  
FIDRES 0.305176 Hz  
AQ 3.2767999 sec  
RG 71.09  
RW 50.000 usec  
DE 6.50 usec  
TE 298.0 K  
D1 1.0000000 sec  
TD0 1  
SFO1 500.1330863 MHz  
NUC1 1H  
FO 3.10 usec  
PI 9.31 usec  
PWI 24.68000031 W

F2 - Processing parameters  
SI 65536  
SF 500.1300128 MHz  
WDW EM  
SSB 0  
LB 0.30 Hz  
GB 0  
PC 1.00



# <sup>1</sup>H-NMR spectra with D<sub>2</sub>O exchange (Table 6, Entry 1)

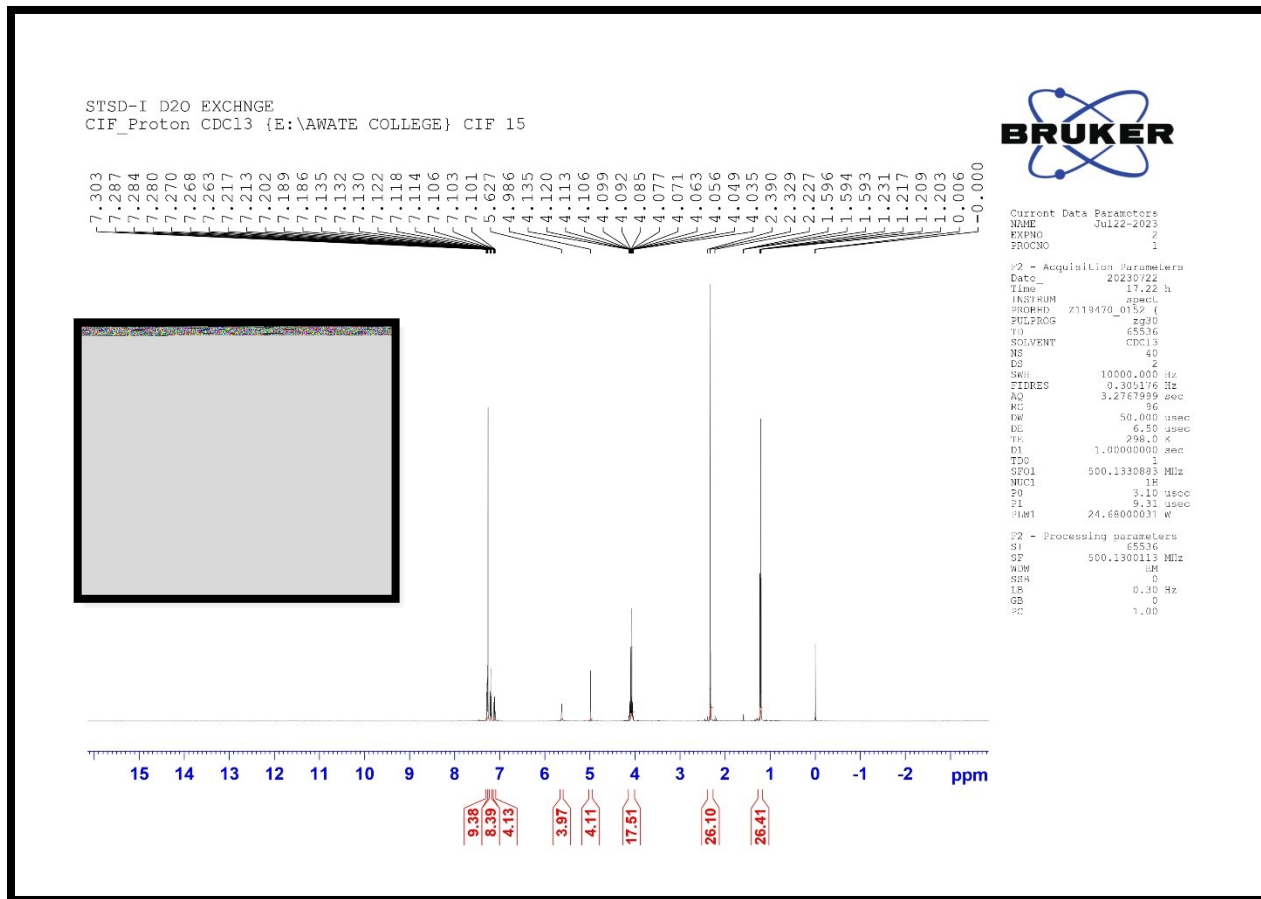

# <sup>13</sup>C NMR spectra (Table 6, Entry 1)

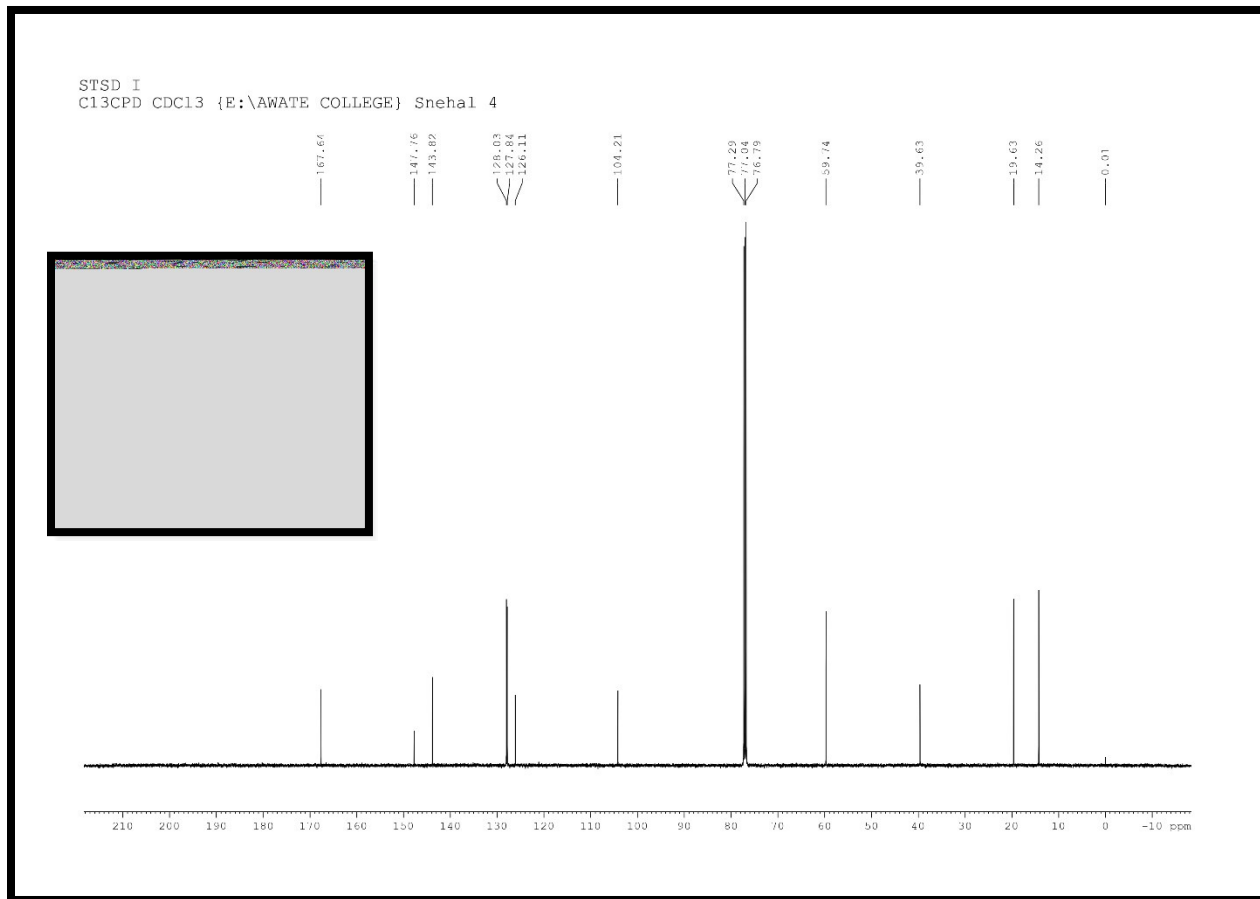

# HRMS (Table 6, Entry 1)

---

## Savitribai Phule Pune University - Central Instrumentation Facility

---

|                      |                                                                                                      |                                      |                         |
|----------------------|------------------------------------------------------------------------------------------------------|--------------------------------------|-------------------------|
| <b>Analysis Info</b> |                                                                                                      | Acquisition Date 7/5/2017 6:19:50 PM |                         |
| Analysis Name        | D:\Data\2017\JUNE\SPPU AFFILIATED\VA AWATE COLLEGE, MANCHAR\KG KANADE\DB BANKAR\STSD-I_RA8_01_3974.d |                                      |                         |
| Method               | dlc-ms600mz_10min.m                                                                                  | Operator                             | CIF                     |
| Sample Name          | STSD-I                                                                                               | Instrument                           | impact HD 1819696.00184 |
| Comment              |                                                                                                      |                                      |                         |

|                              |         |                      |          |                  |           |
|------------------------------|---------|----------------------|----------|------------------|-----------|
| <b>Acquisition Parameter</b> |         |                      |          |                  |           |
| Source Type                  | ESI     | Ion Polarity         | Positive | Set Nebulzer     | 0.3 Bar   |
| Focus                        | Active  | Set Capillary        | 3500 V   | Set Dry Heater   | 200 °C    |
| Scan Begin                   | 50 m/z  | Set End Plate Offset | -500 V   | Set Dry Gas      | 4.0 l/min |
| Scan End                     | 600 m/z | Set Charging Voltage | 2000 V   | Set Divert Valve | Waste     |
|                              |         | Set Corona           | 0 nA     | Set APCI Heater  | 0 °C      |

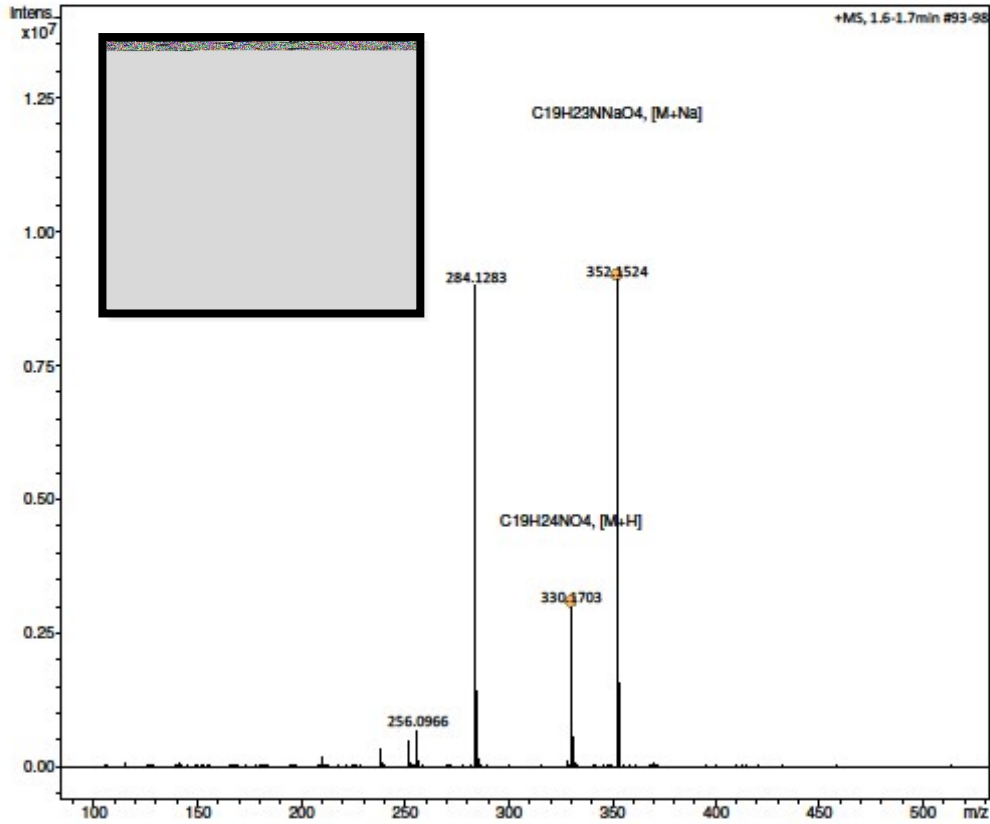

| Meas. m/z | # | Ion Formula | m/z      | err [ppm] | mSigma | # mSigma | Score  | rdB | e <sup>-</sup> | Conf | N-Rule | Adduct |
|-----------|---|-------------|----------|-----------|--------|----------|--------|-----|----------------|------|--------|--------|
| 330.1703  | 1 | C19H24NO4   | 330.1700 | -1.0      | 17.9   | 1        | 100.00 | 8.5 | even           |      | ok     | M+H    |
| 352.1524  | 1 | C19H23NNaO4 | 352.1519 | -1.5      | 25.0   | 1        | 100.00 | 8.5 | even           |      | ok     | M+Na   |

FTIR (Table 6, Entry 2)

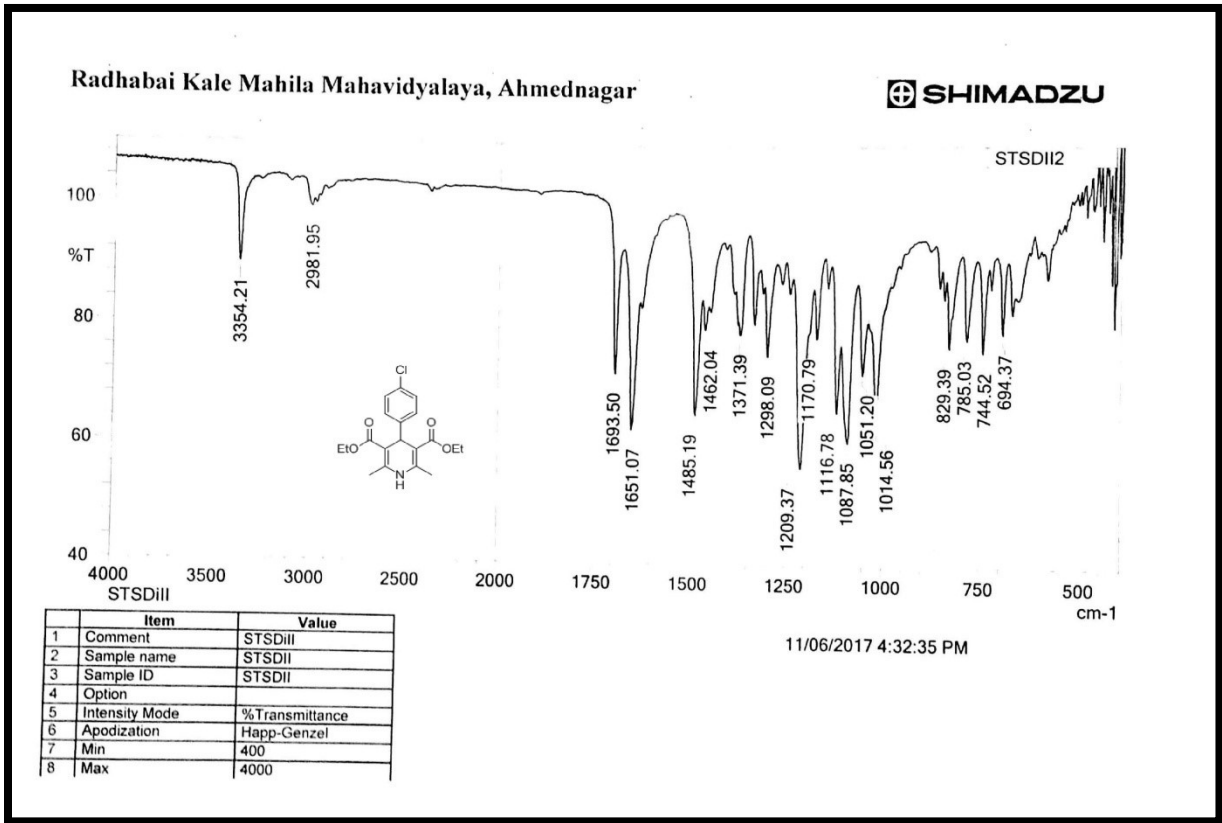

# <sup>1</sup>H-NMR spectra (Table 6, Entry 2)

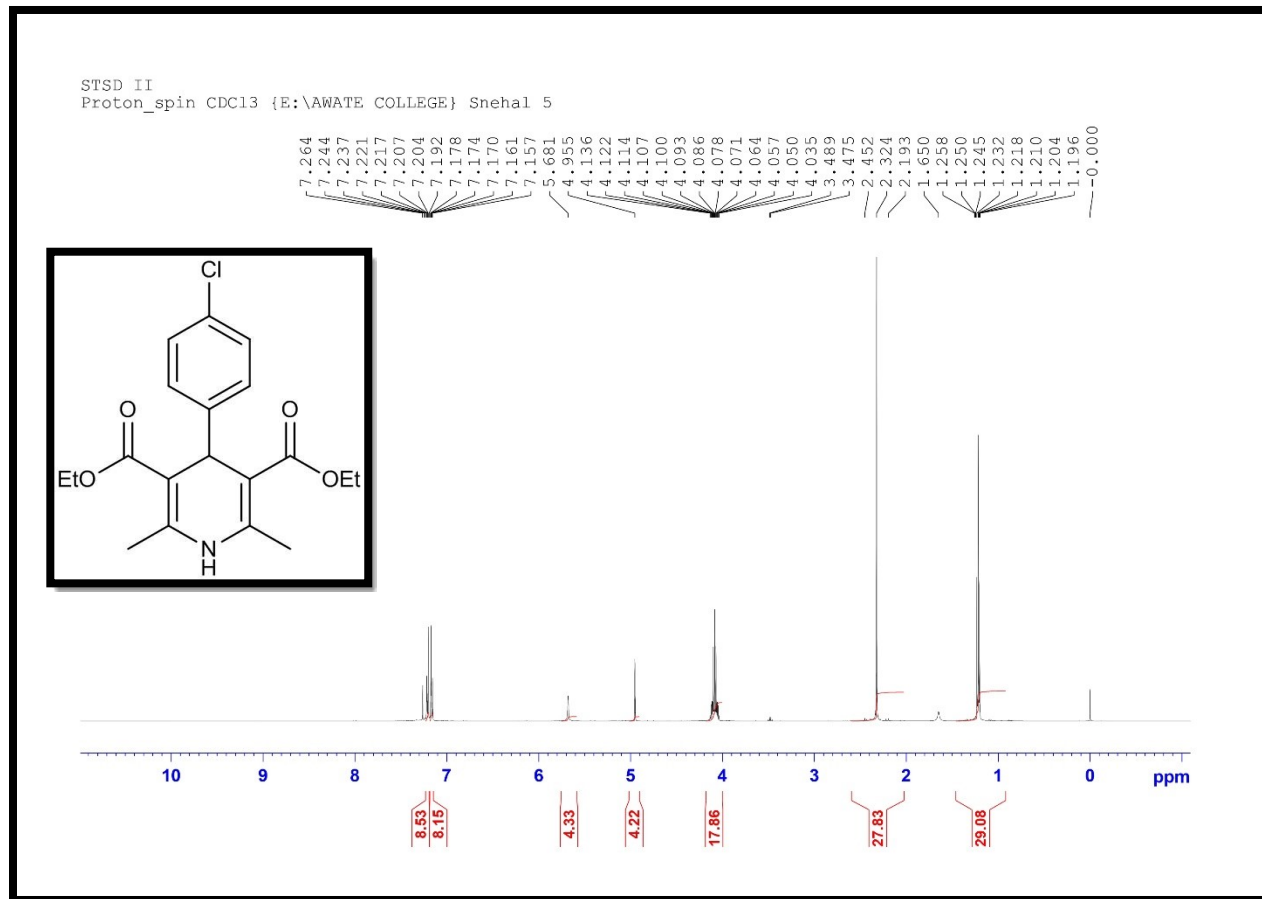

# <sup>1</sup>H-NMR spectra without D<sub>2</sub>O exchange (Table 6, Entry 2)

STSD-II  
CIF\_Proton CDC13 {E:\AWATE COLLEGE} CIF 16

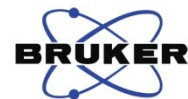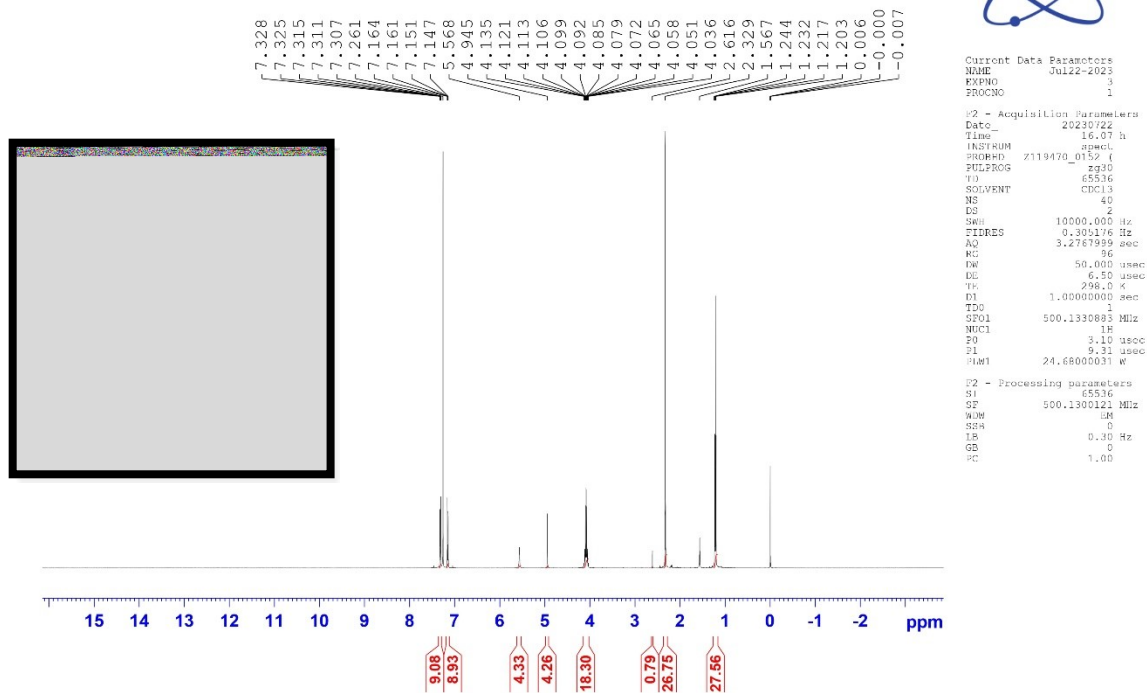

# <sup>1</sup>H-NMR spectra with D<sub>2</sub>O exchange (Table 6, Entry 2)

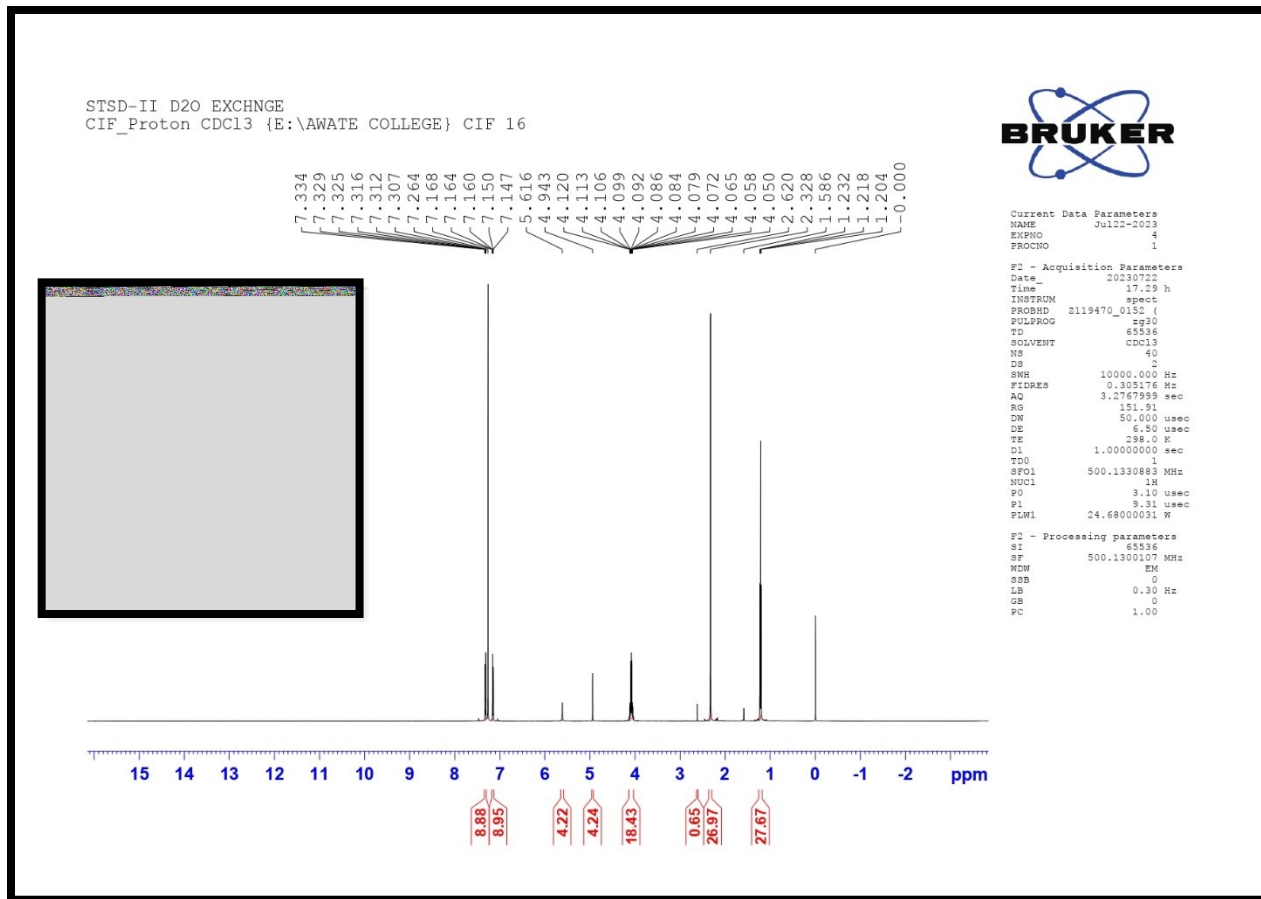

# <sup>13</sup>C-NMR spectra (Table 6, Entry 2)

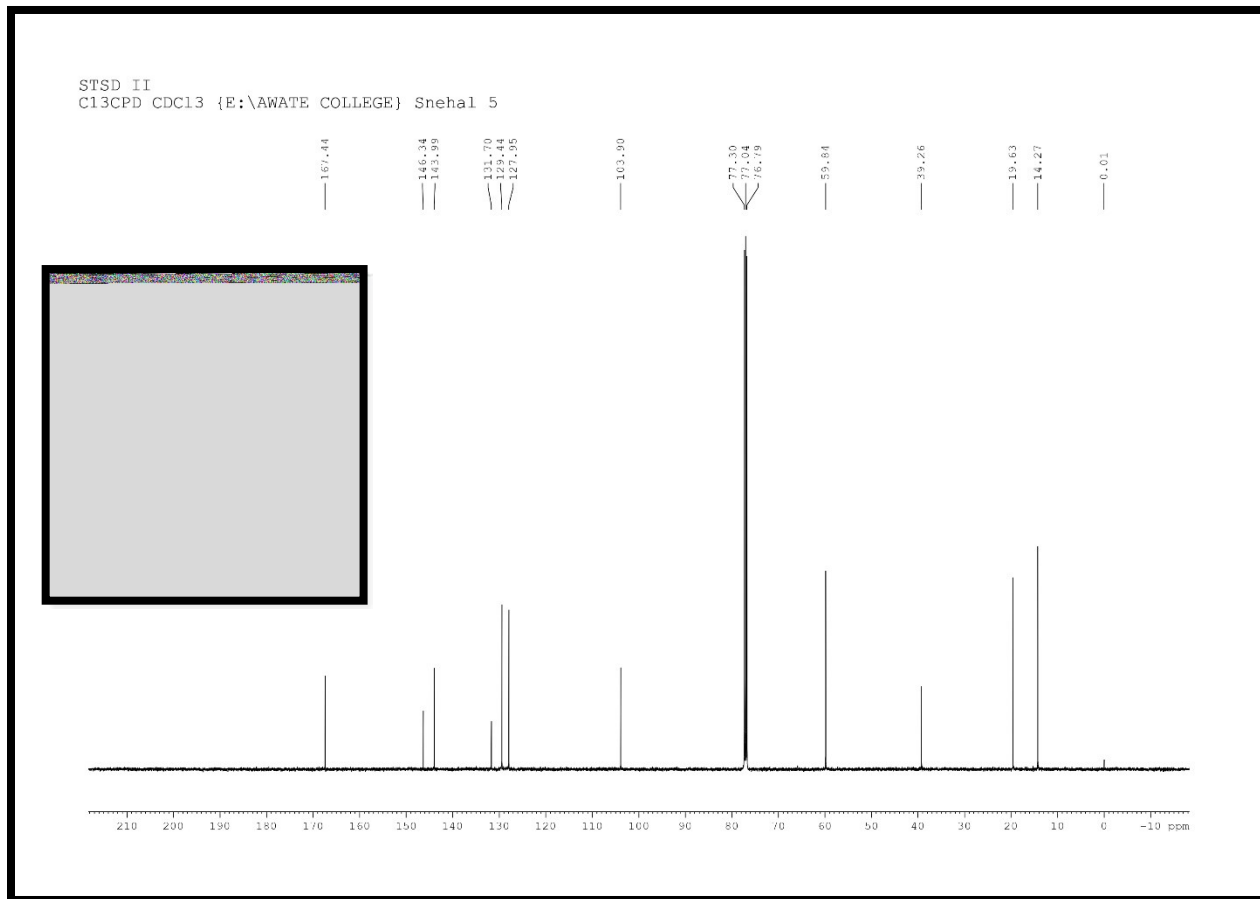



## HRMS (Table 6, Entry 2)

---

### Savitribai Phule Pune University - Central Instrumentation Facility

---

|                      |                                                                                                       |                                      |                         |
|----------------------|-------------------------------------------------------------------------------------------------------|--------------------------------------|-------------------------|
| <b>Analysis Info</b> |                                                                                                       | Acquisition Date 7/5/2017 7:23:41 PM |                         |
| Analysis Name        | D:\Data\2017\JUNE\SPPU AFFILIATED\VA AWATE COLLEGE, MANCHAR\KG KANADE\DB BANKAR\STSD-II_RB1_01_3975.d |                                      |                         |
| Method               | dlc-ms600mz_10min.m                                                                                   | Operator                             | CIF                     |
| Sample Name          | STSD-II                                                                                               | Instrument                           | impact HD 1819696.00184 |
| Comment              |                                                                                                       |                                      |                         |

|                              |         |                      |          |                  |           |
|------------------------------|---------|----------------------|----------|------------------|-----------|
| <b>Acquisition Parameter</b> |         |                      |          |                  |           |
| Source Type                  | ESI     | Ion Polarity         | Positive | Set Nebulzer     | 0.3 Bar   |
| Focus                        | Active  | Set Capillary        | 3500 V   | Set Dry Heater   | 200 °C    |
| Scan Begin                   | 50 m/z  | Set End Plate Offset | -500 V   | Set Dry Gas      | 4.0 l/min |
| Scan End                     | 600 m/z | Set Charging Voltage | 2000 V   | Set Divert Valve | Waste     |
|                              |         | Set Corona           | 0 nA     | Set APCI Heater  | 0 °C      |

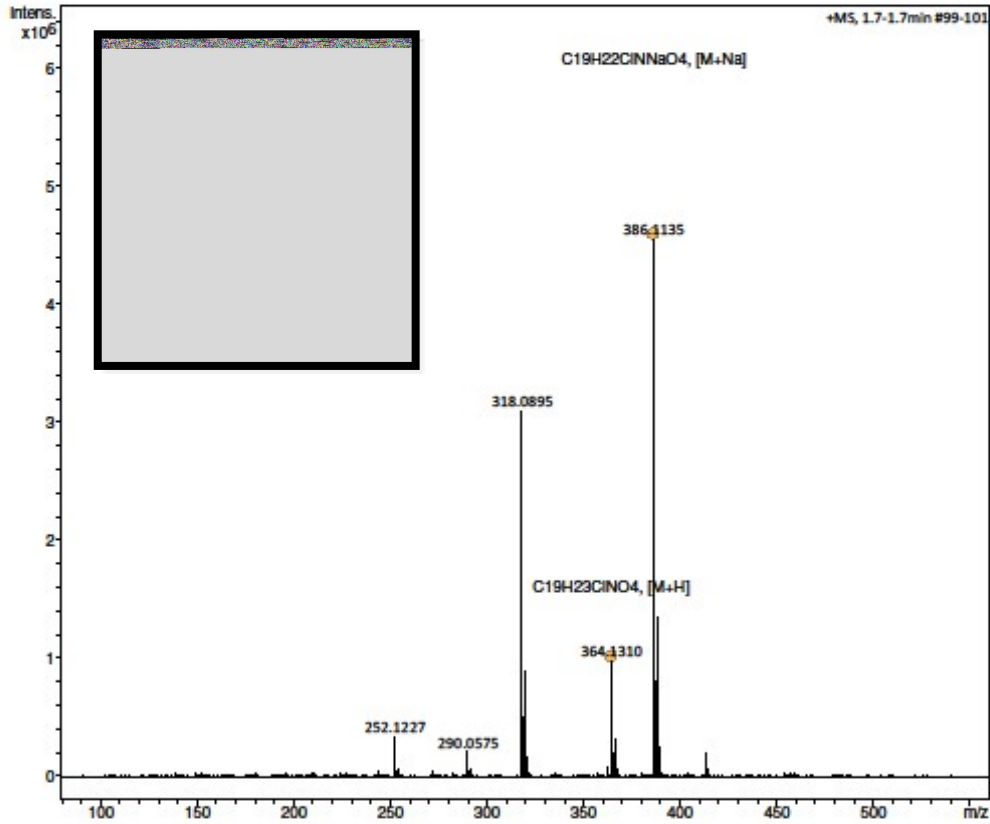

| Meas. m/z | # | Ion Formula   | m/z      | err [ppm] | mSigma | # mSigma | Score  | rdb | e <sup>-</sup> | Conf | N-Rule | Adduct |
|-----------|---|---------------|----------|-----------|--------|----------|--------|-----|----------------|------|--------|--------|
| 364.1310  | 1 | C19H23ClNO4   | 364.1310 | -0.1      | 12.0   | 1        | 100.00 | 8.5 | even           |      | ok     | M+H    |
| 386.1135  | 1 | C19H22CINNaO4 | 386.1130 | -1.5      | 30.1   | 1        | 100.00 | 8.5 | even           |      | ok     | M+Na   |

FTIR (Table 6, Entry 3)

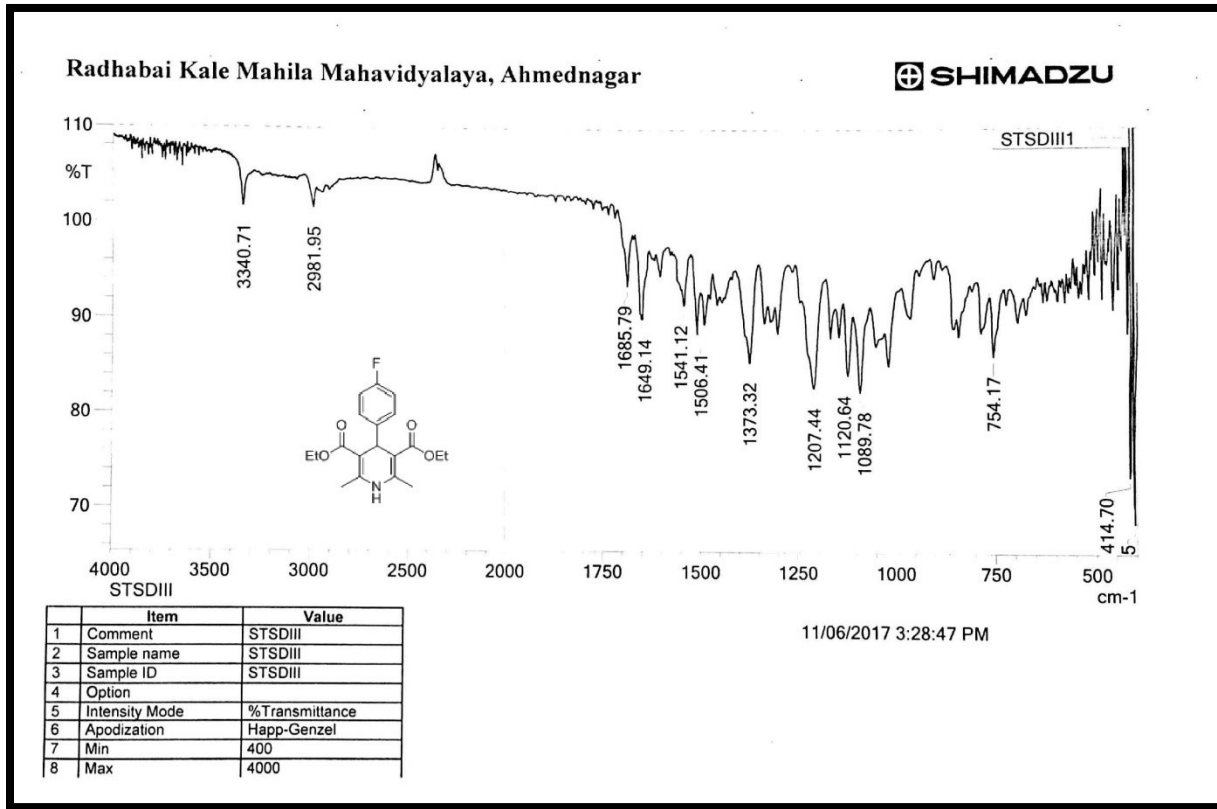

# <sup>1</sup>H-NMR spectra (Table 6, Entry 3) at 500 MHz

STSD III  
Proton\_spin CDC13 {E:\AWATE COLLEGE} Snehal 6

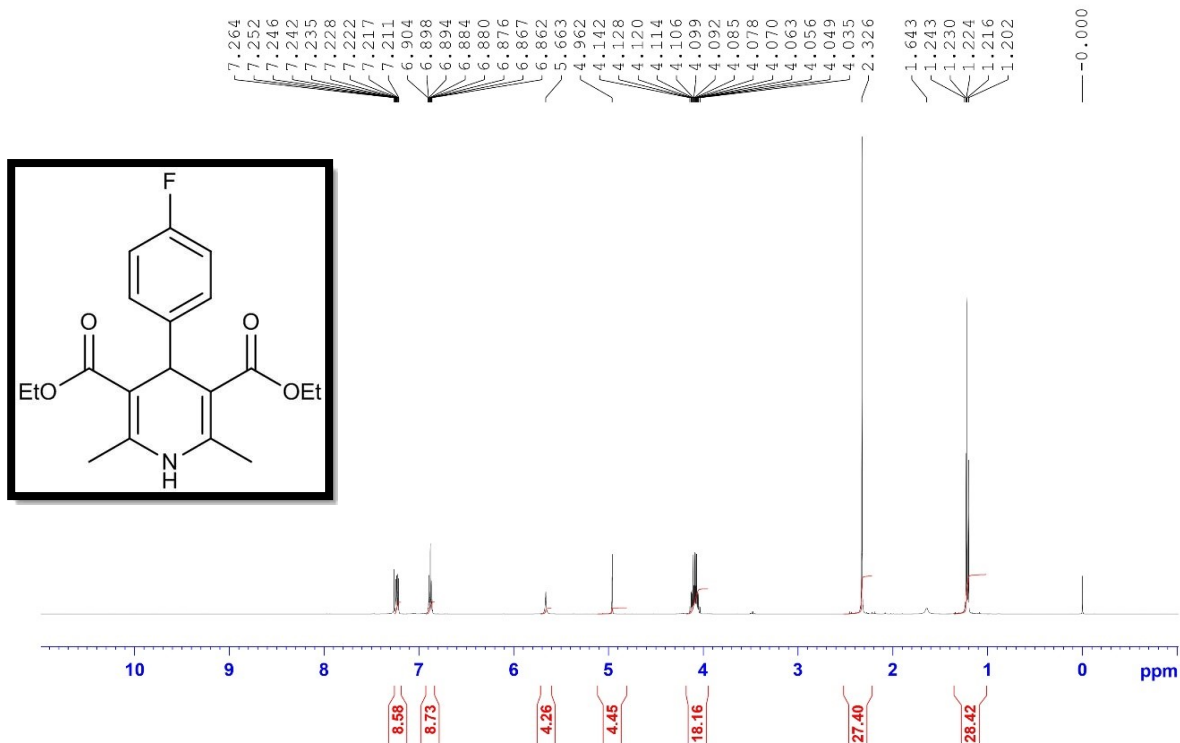

### <sup>13</sup>C-NMR spectra (Table 6, Entry 3)

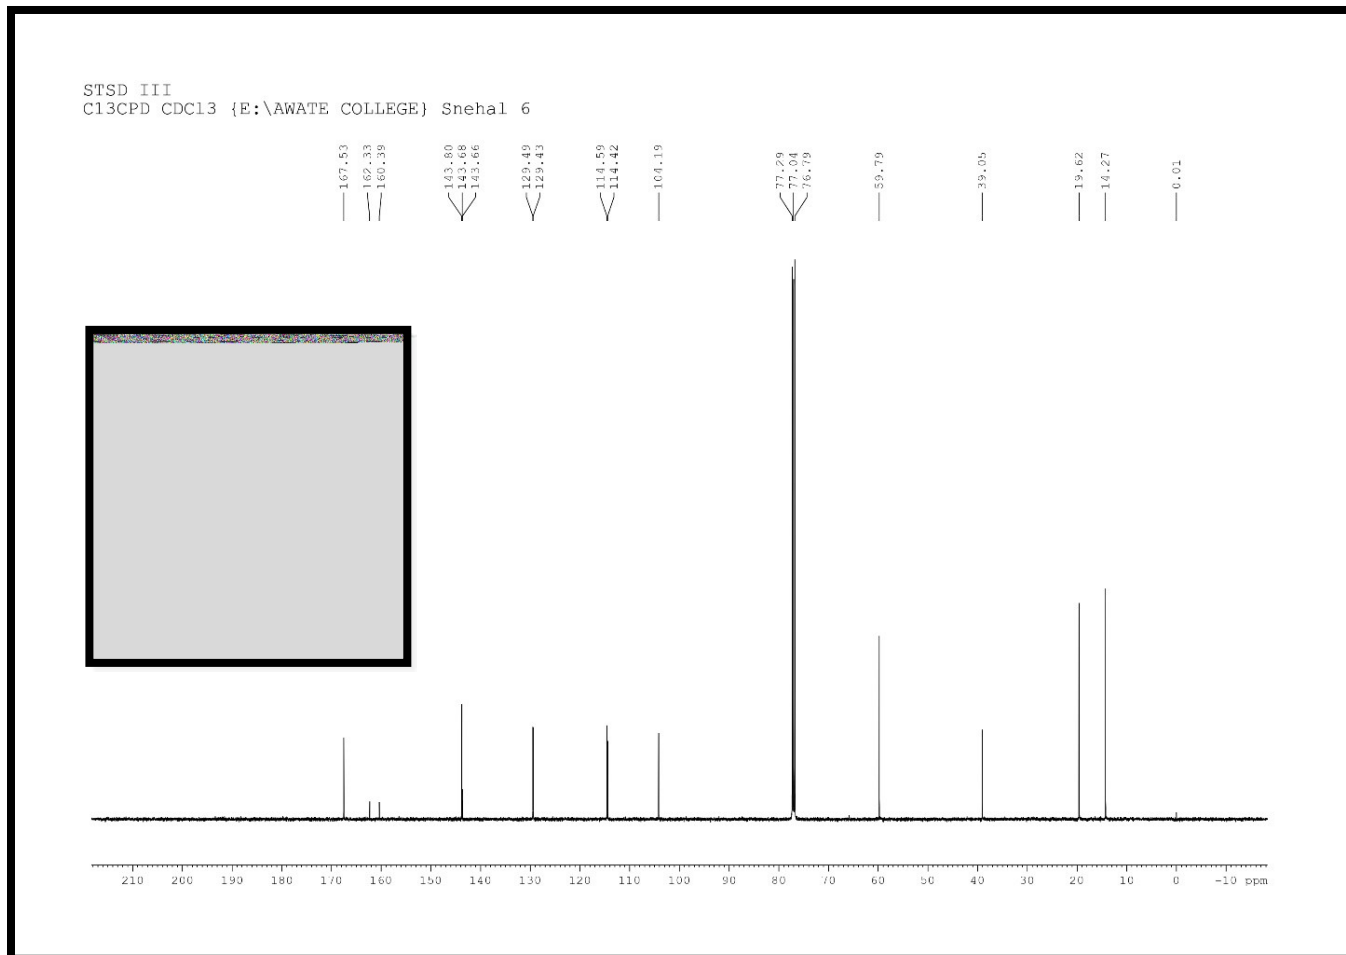

### Expansion image of $^{13}\text{C}$ -NMR (Table 6, Entry 3)

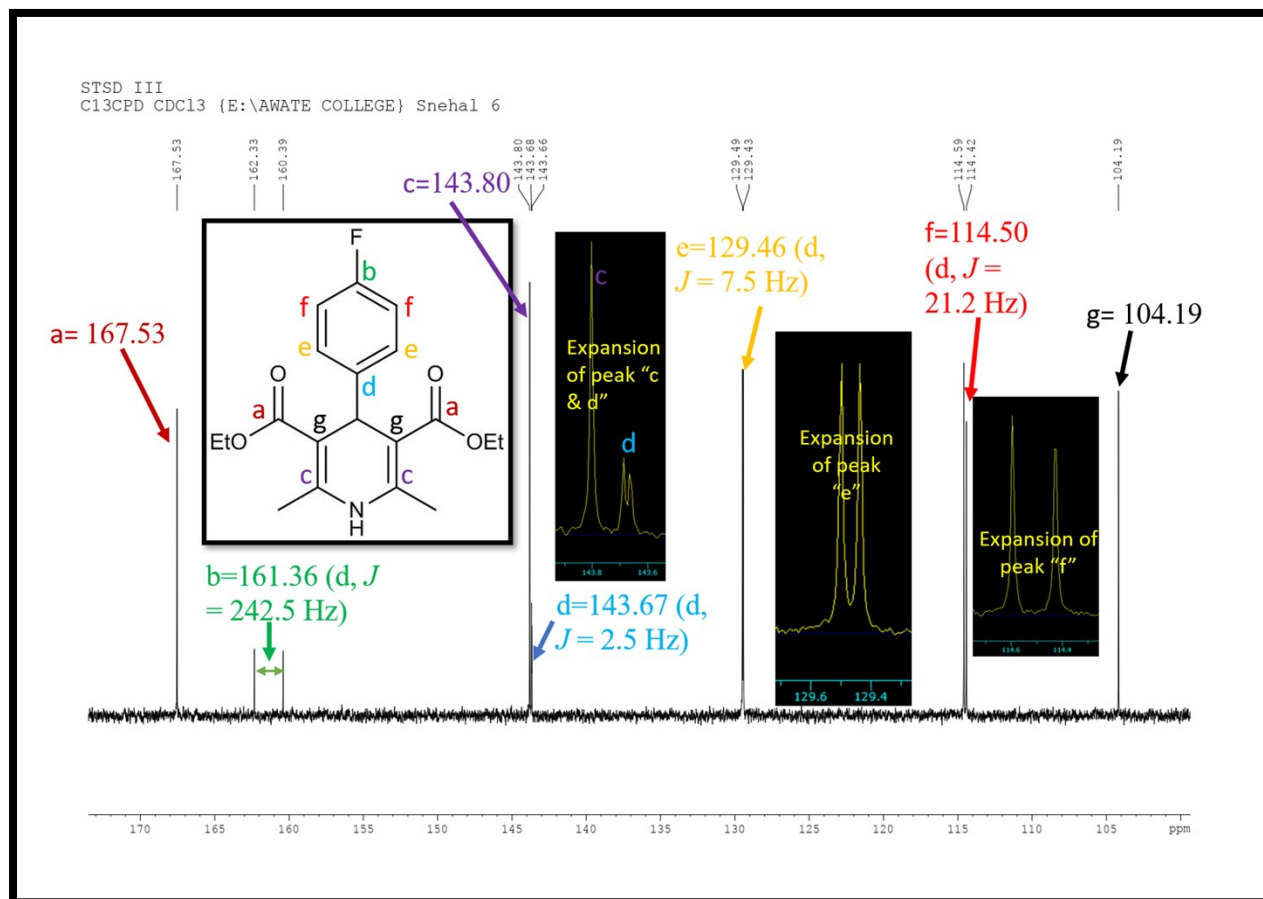

## HRMS (Table 6, Entry 3)

---

### Savitribai Phule Pune University - Central Instrumentation Facility

---

|                      |                                                                                                       |                                      |                         |
|----------------------|-------------------------------------------------------------------------------------------------------|--------------------------------------|-------------------------|
| <b>Analysis Info</b> |                                                                                                       | Acquisition Date 7/5/2017 7:37:10 PM |                         |
| Analysis Name        | D:\Data\2017\JUNE\SPPU AFFILIATED\A AWATE COLLEGE, MANCHAR\KG KANADE\DB BANKAR\STSD-III_RB2_01_3976.d |                                      |                         |
| Method               | dlc-ms600mz_10min.m                                                                                   | Operator                             | CIF                     |
| Sample Name          | STSD-III                                                                                              | Instrument                           | impact HD 1819696.00184 |
| Comment              |                                                                                                       |                                      |                         |

|                              |         |                      |          |                  |           |
|------------------------------|---------|----------------------|----------|------------------|-----------|
| <b>Acquisition Parameter</b> |         |                      |          |                  |           |
| Source Type                  | ESI     | Ion Polarity         | Positive | Set Nebulizer    | 0.3 Bar   |
| Focus                        | Active  | Set Capillary        | 3500 V   | Set Dry Heater   | 200 °C    |
| Scan Begin                   | 50 m/z  | Set End Plate Offset | -500 V   | Set Dry Gas      | 4.0 l/min |
| Scan End                     | 600 m/z | Set Charging Voltage | 2000 V   | Set Divert Valve | Waste     |
|                              |         | Set Corona           | 0 nA     | Set APCI Heater  | 0 °C      |

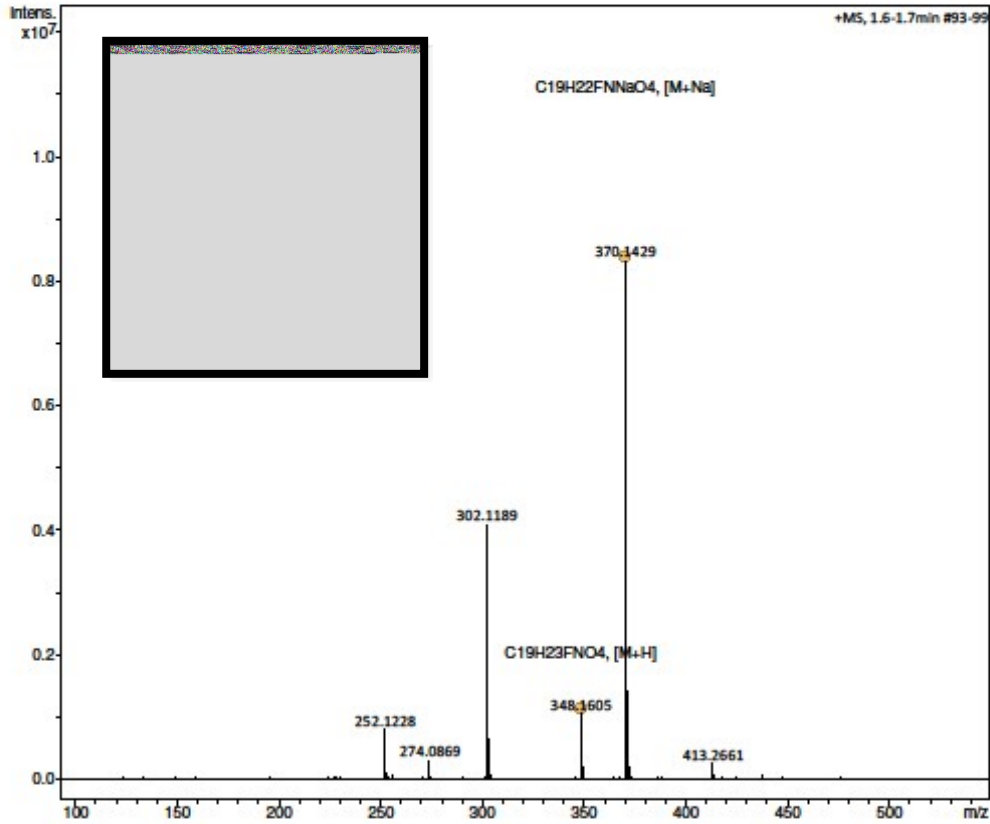

| Meas. m/z | # | Ion Formula  | m/z      | err [ppm] | mSigma | # mSigma | Score  | rdb | e <sup>-</sup> | Conf | N-Rule | Adduct |
|-----------|---|--------------|----------|-----------|--------|----------|--------|-----|----------------|------|--------|--------|
| 348.1605  | 1 | C19H23FO4    | 348.1606 | 0.0       | 12.2   | 1        | 100.00 | 8.5 | even           |      | ok     | M+H    |
| 370.1429  | 1 | C19H22FNNaO4 | 370.1425 | -1.2      | 25.0   | 1        | 100.00 | 8.5 | even           |      | ok     | M+Na   |

# FTIR (Table 6, Entry 4)

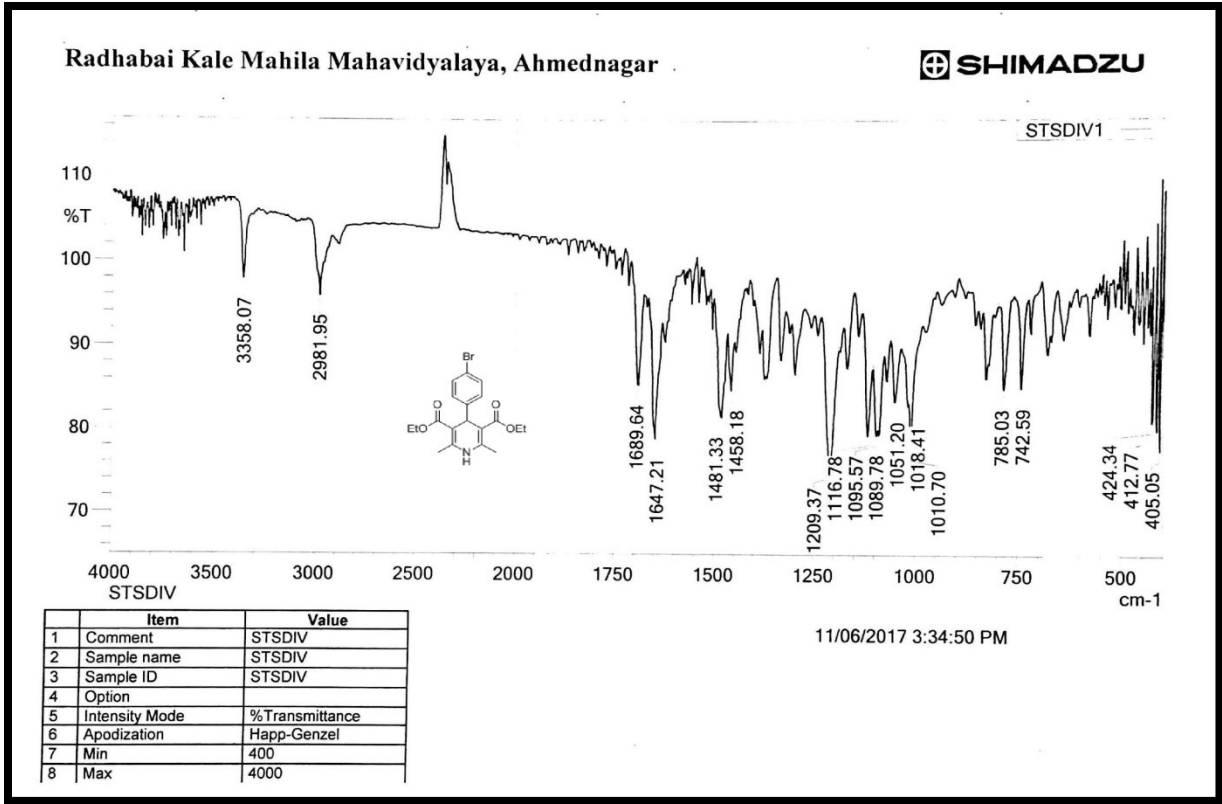

# <sup>1</sup>H-NMR spectra (Table 6, Entry 4)

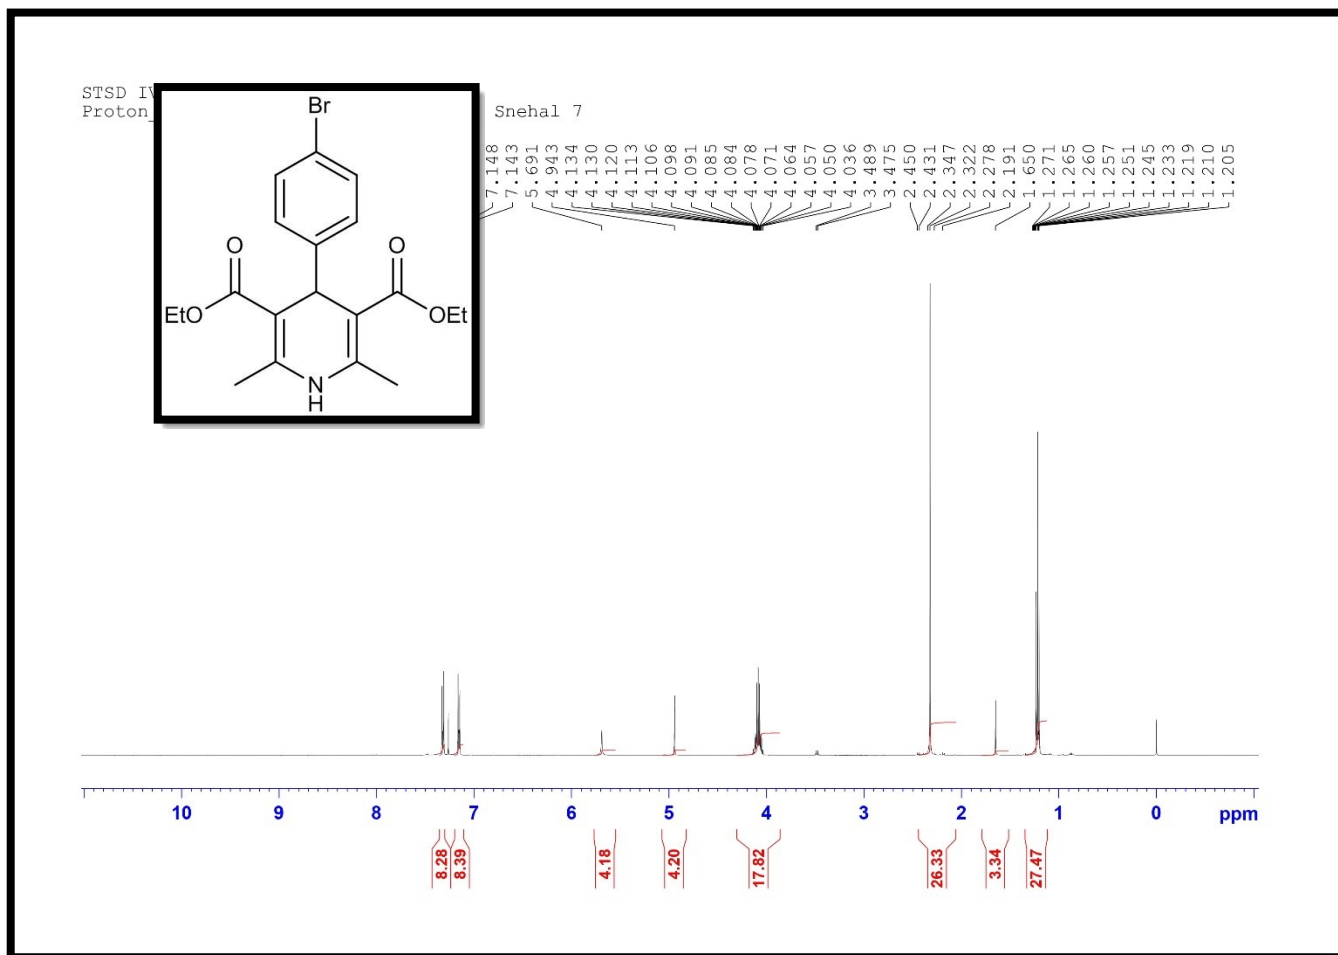



# <sup>1</sup>H-NMR spectra without D<sub>2</sub>O exchange (Table 6, Entry 4)

STSD-IV  
CIF\_Proton CDCl<sub>3</sub> (E:\AWATE COLLEGE) CIF 17

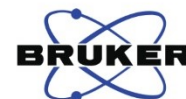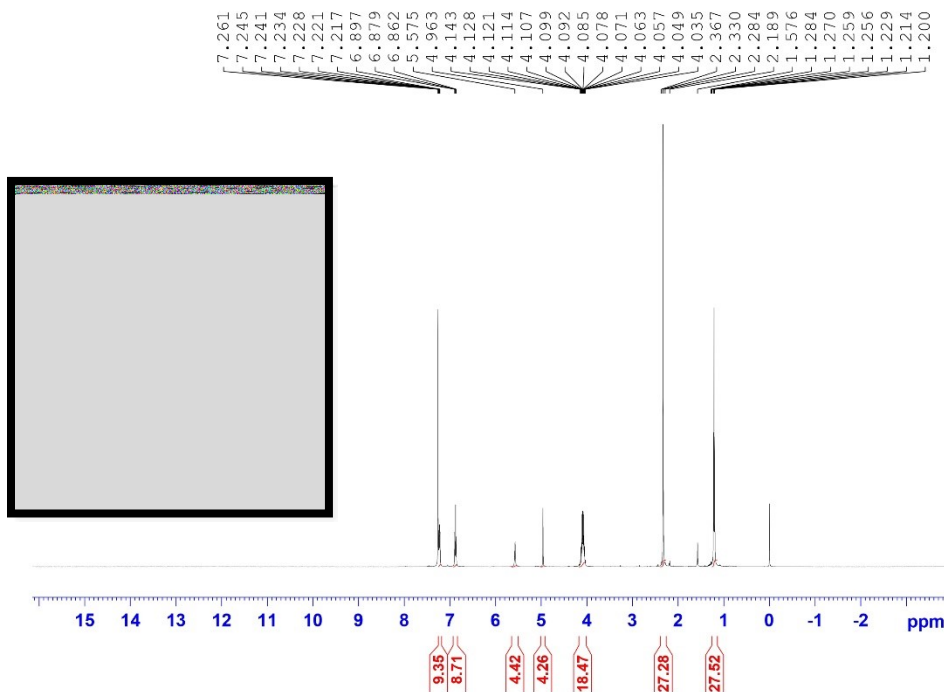

Current Data Parameters  
NAME Jul22-2023  
EXNO 5  
PROCNO 1

F2 - Acquisition Parameters  
Date 20230722  
Time 16.15 h  
INSTRUM spect  
PROBHD Z119470.0152 (   
PULPROG zg30  
TD 65536  
SOLVENT CDCl<sub>3</sub>  
NS 40  
DS 2  
SMU 10000.000 Hz  
FIDRES 0.305176 Hz  
AQ 3.2767399 sec  
RG 96  
ZM 50.000 usoc  
DE 6.50 usoc  
TE 298.0 K  
D1 1.00000000 sec  
TDO 1  
SFO1 500.1330863 MHz  
RUC1 1H  
PD 3.10 usoc  
P1 9.31 usoc  
PLW1 24.68000031 W

F2 - Processing parameters  
SI 65536  
SF 500.1300119 MHz  
NUC 1H  
SSB 0  
LB 0.30 Hz  
GB 0  
PC 1.00

# <sup>1</sup>H-NMR spectra with D<sub>2</sub>O exchange (Table 6, Entry 4)

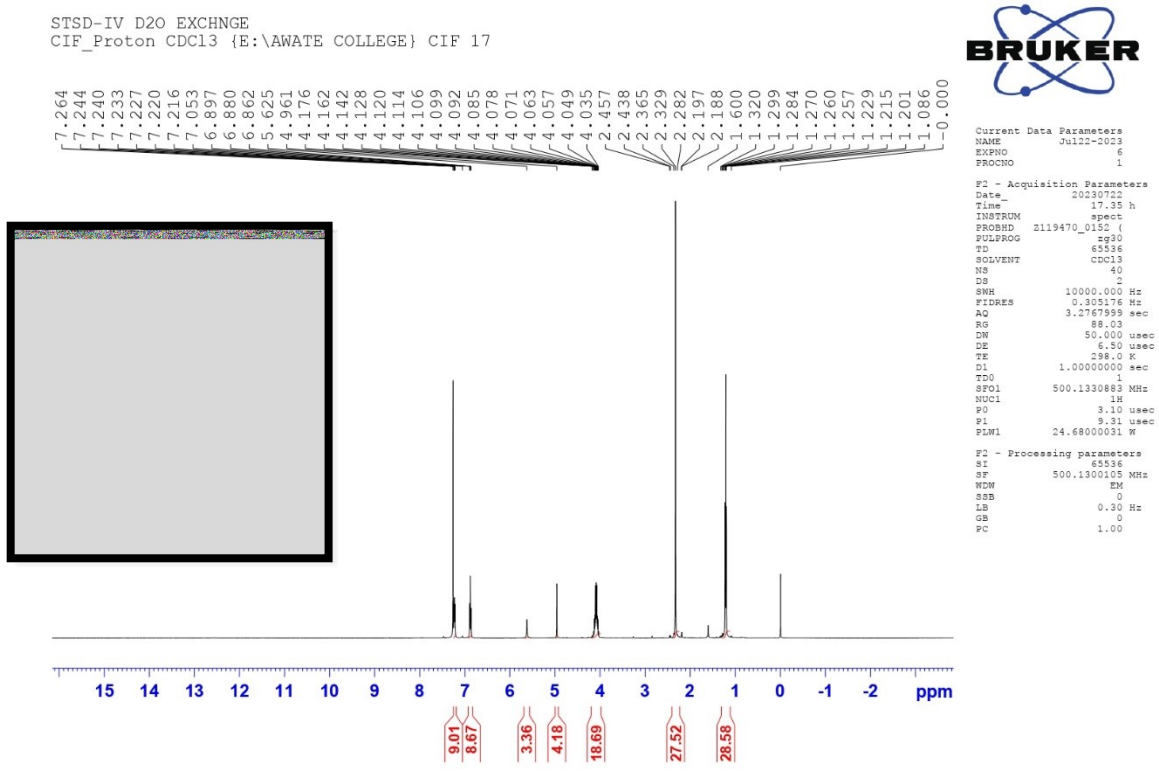

### <sup>13</sup>C-NMR spectra (Table 6, Entry 4)

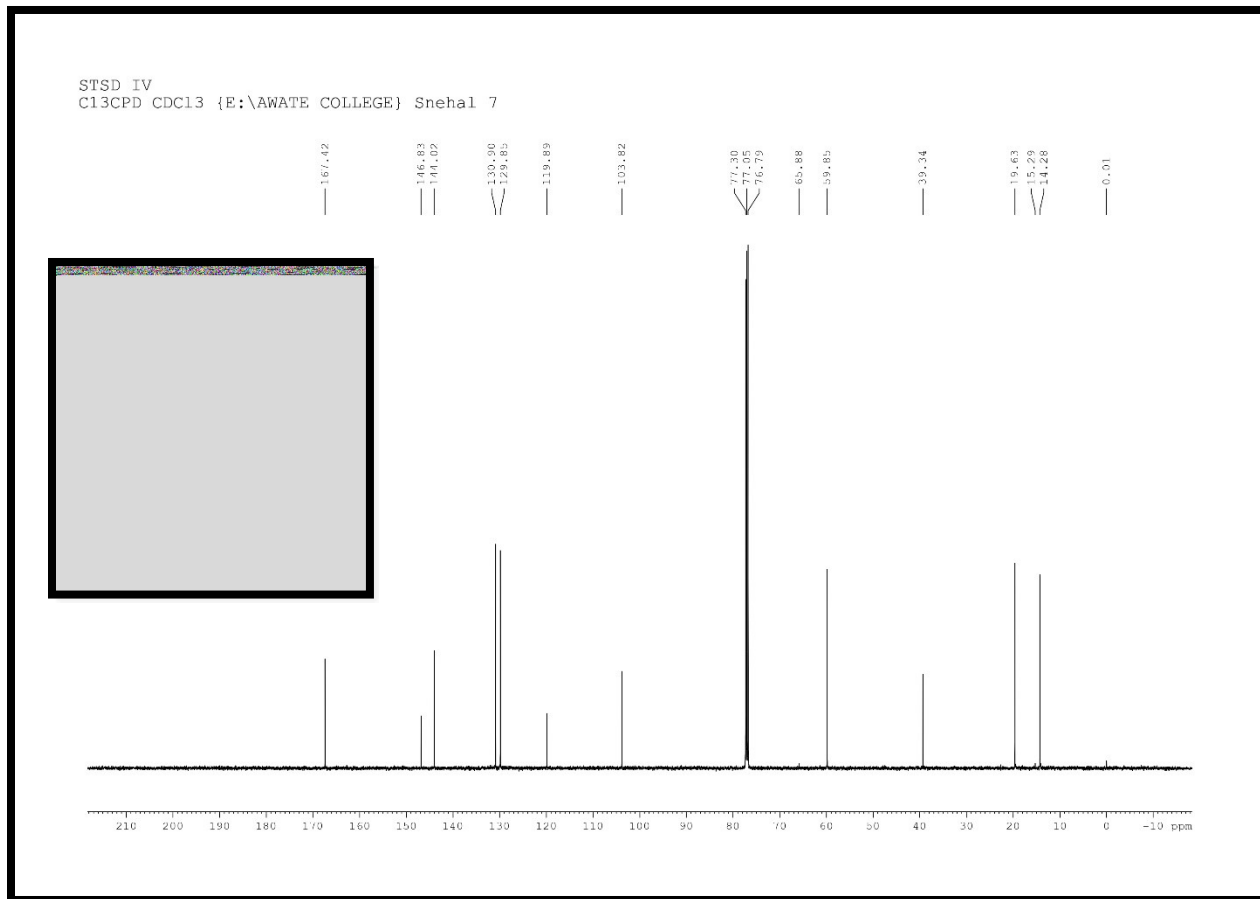

## HRMS (Table 6, Entry 4)

### Savitribai Phule Pune University - Central Instrumentation Facility

|                      |                                                                                                      |                                      |                         |
|----------------------|------------------------------------------------------------------------------------------------------|--------------------------------------|-------------------------|
| <b>Analysis Info</b> |                                                                                                      | Acquisition Date 7/5/2017 7:47:51 PM |                         |
| Analysis Name        | D:\Data\2017\JUNE\SPPU AFFILIATED\A AWATE COLLEGE, MANCHAR\KG KANADE\DB BANKAR\STSD-IV_RB3_01_3977.d |                                      |                         |
| Method               | dlc-ms600mz_10min.m                                                                                  | Operator                             | CIF                     |
| Sample Name          | STSD-IV                                                                                              | Instrument                           | impact HD 1819696.00184 |
| Comment              |                                                                                                      |                                      |                         |

|                              |         |                      |          |                  |           |
|------------------------------|---------|----------------------|----------|------------------|-----------|
| <b>Acquisition Parameter</b> |         |                      |          |                  |           |
| Source Type                  | ESI     | Ion Polarity         | Positive | Set Nebulizer    | 0.3 Bar   |
| Focus                        | Active  | Set Capillary        | 3500 V   | Set Dry Heater   | 200 °C    |
| Scan Begin                   | 50 m/z  | Set End Plate Offset | -500 V   | Set Dry Gas      | 4.0 l/min |
| Scan End                     | 600 m/z | Set Charging Voltage | 2000 V   | Set Divert Valve | Waste     |
|                              |         | Set Corona           | 0 nA     | Set APCI Heater  | 0 °C      |

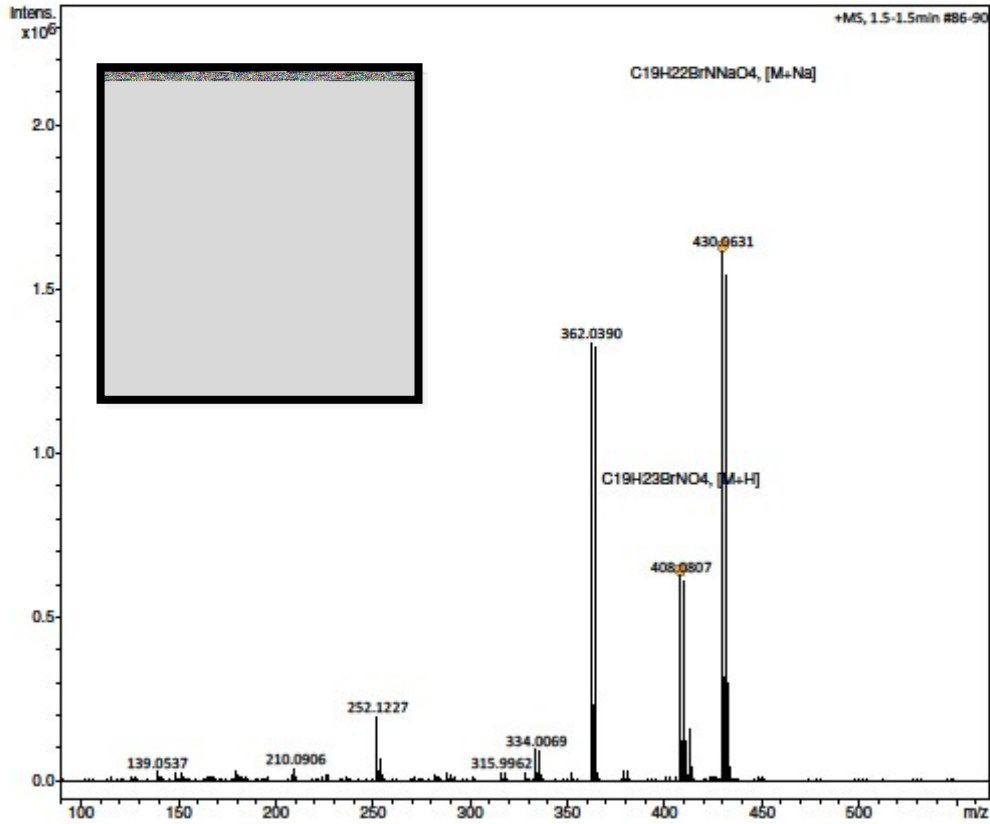

| Meas. m/z | # | Ion Formula  | m/z      | err [ppm] | mSigma | # mSigma | Score  | rdb | e <sup>-</sup> | Conf | N-Rule | Adduct |
|-----------|---|--------------|----------|-----------|--------|----------|--------|-----|----------------|------|--------|--------|
| 408.0807  | 1 | C19H23BrNO4  | 408.0805 | -0.5      | 14.7   | 1        | 100.00 | 8.5 | even           |      | ok     | M+H    |
| 430.0631  | 1 | C19H22BrNNO4 | 430.0624 | -1.6      | 24.2   | 1        | 100.00 | 8.5 | even           |      | ok     | M+Na   |

STSD-IV\_RB3\_01\_3977.d

Bruker Compass DataAnalysis 4.2

printed: 7/5/2017 9:33:36 PM

by: CIF

Page 1 of 1

FTIR (Table 6, Entry 5)

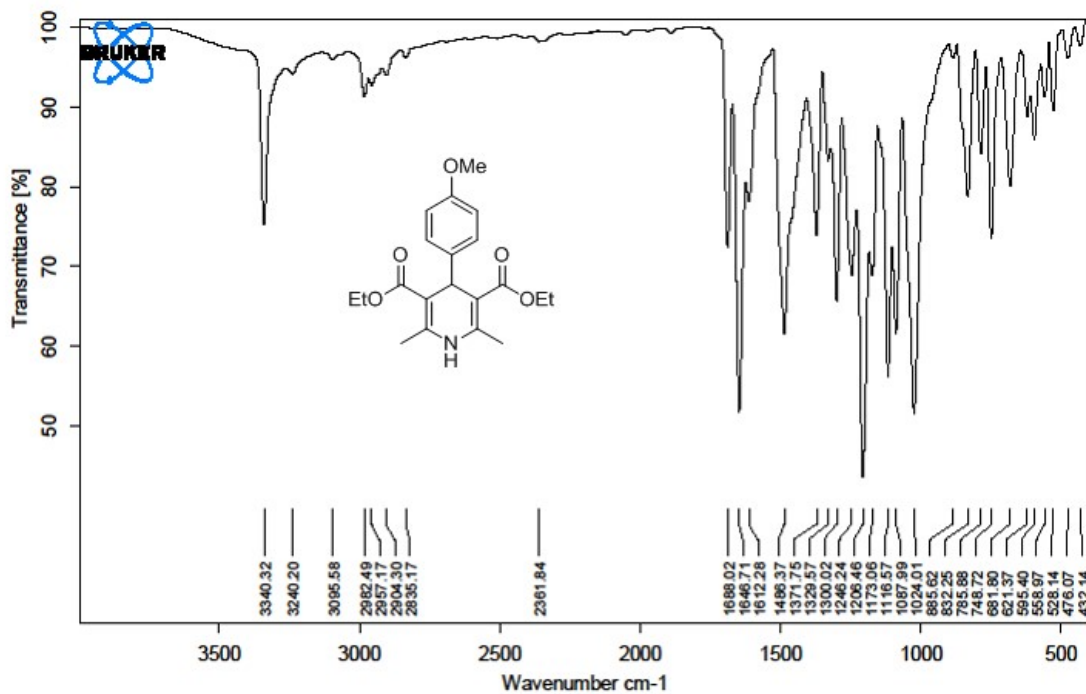

D:\OPUS\FTIR DATA 2017\JUNE\14 JUNE 2017\AAC.MANCHAR\STS-DV.0

STS-DV

SOLID

14/08/2017

### <sup>1</sup>H-NMR spectra (Table 6, Entry 5)

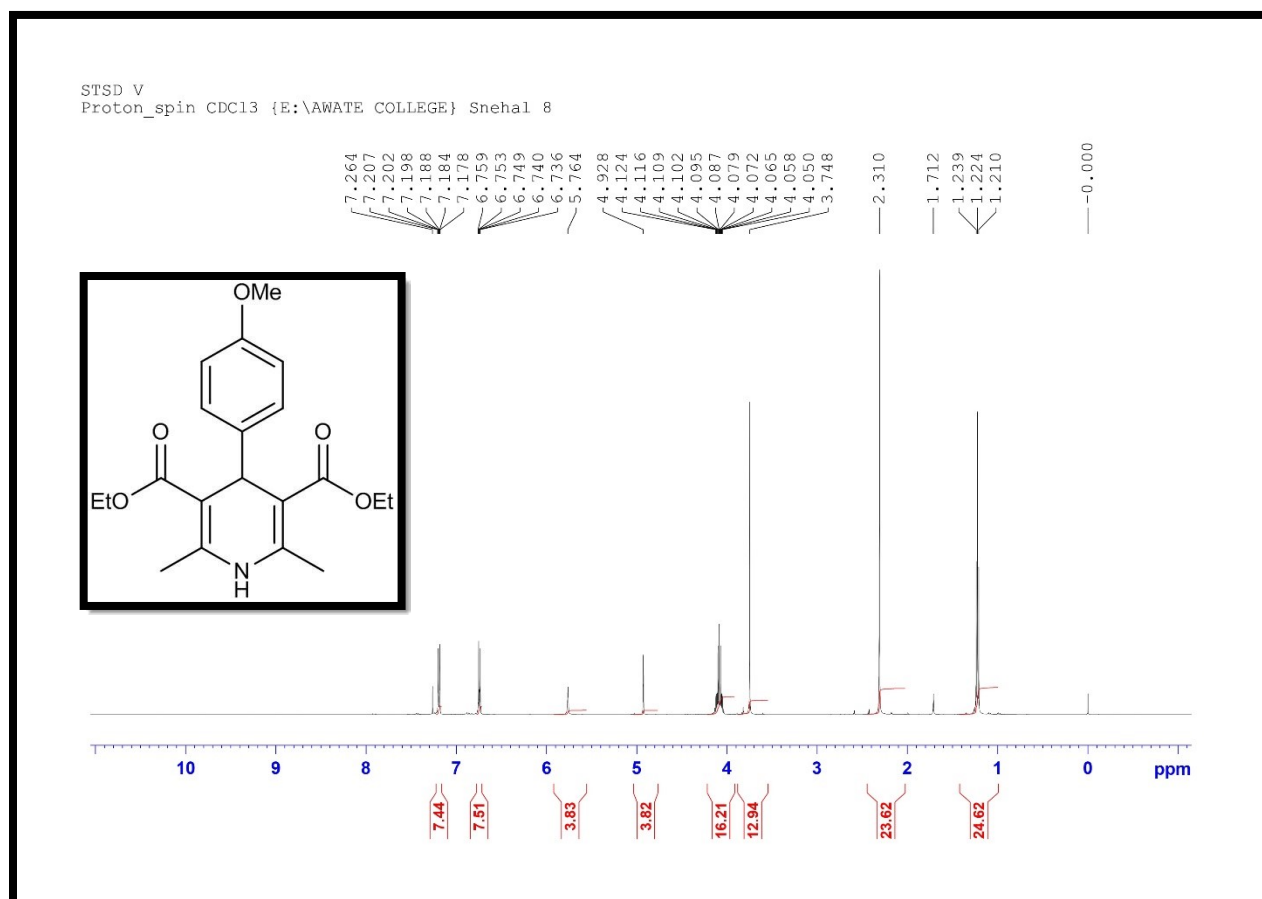

# <sup>13</sup>C-NMR spectra (Table 6, Entry 5)

STSD V  
C13CPD CDC13 {E:

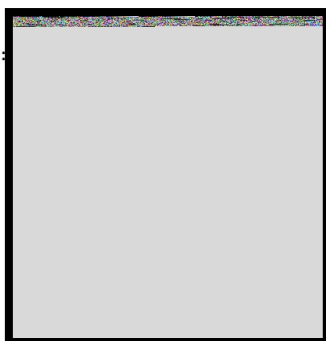

114.29  
113.31  
113.19

104.34

77.32  
77.06  
76.81

59.72  
55.35  
55.15

39.64  
38.74

19.36  
14.29  
13.75

0.01

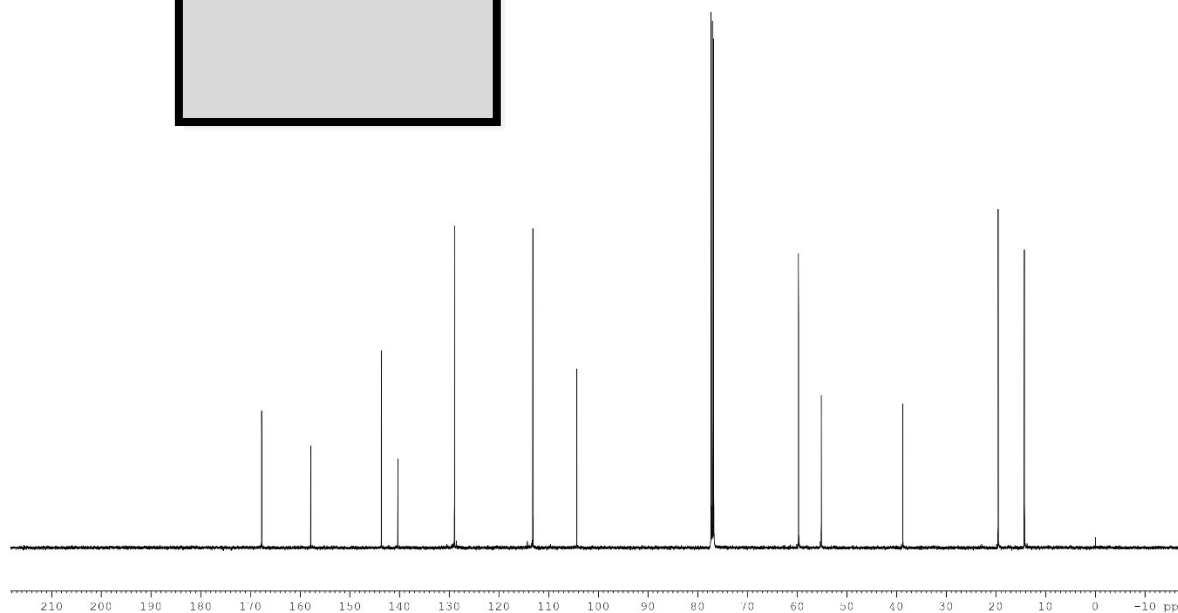

## HRMS (Table 6, Entry 5)

---

### Savitribai Phule Pune University - Central Instrumentation Facility

---

|                      |                                                                                                      |                                      |                         |
|----------------------|------------------------------------------------------------------------------------------------------|--------------------------------------|-------------------------|
| <b>Analysis Info</b> |                                                                                                      | Acquisition Date 7/5/2017 7:58:32 PM |                         |
| Analysis Name        | D:\Data\2017\JUNE\SPPU AFFILIATED\VA AWATE COLLEGE, MANCHAR\KG KANADE\DB BANKAR\STSD-V_RB4_01_3978.d |                                      |                         |
| Method               | dlc-ms600mz_10min.m                                                                                  | Operator                             | CIF                     |
| Sample Name          | STSD-V                                                                                               | Instrument                           | impact HD 1819696.00184 |
| Comment              |                                                                                                      |                                      |                         |

|                              |         |                      |          |                  |           |
|------------------------------|---------|----------------------|----------|------------------|-----------|
| <b>Acquisition Parameter</b> |         |                      |          |                  |           |
| Source Type                  | ESI     | Ion Polarity         | Positive | Set Nebulzer     | 0.3 Bar   |
| Focus                        | Active  | Set Capillary        | 3500 V   | Set Dry Heater   | 200 °C    |
| Scan Begin                   | 50 m/z  | Set End Plate Offset | -500 V   | Set Dry Gas      | 4.0 l/min |
| Scan End                     | 600 m/z | Set Charging Voltage | 2000 V   | Set Divert Valve | Waste     |
|                              |         | Set Corona           | 0 nA     | Set APCI Heater  | 0 °C      |

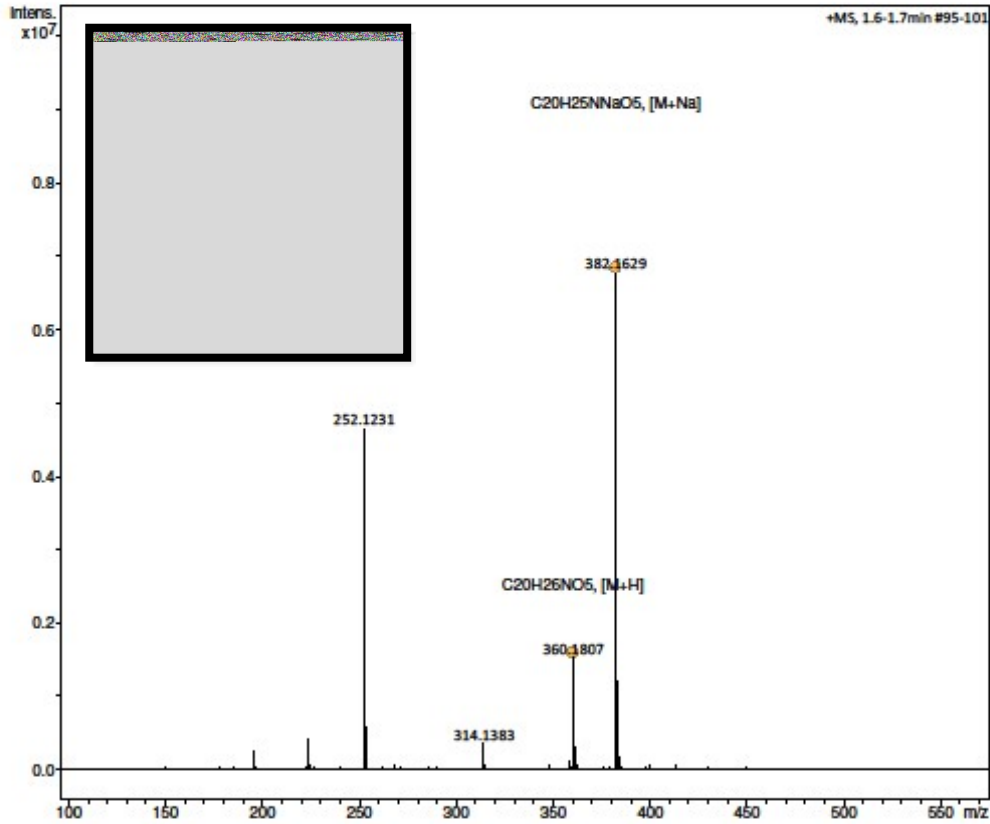

| Meas. m/z | # | Ion Formula                                       | m/z      | err [ppm] | mSigma | # mSigma | Score  | rdB | e <sup>-</sup> | Conf | N-Rule | Adduct |
|-----------|---|---------------------------------------------------|----------|-----------|--------|----------|--------|-----|----------------|------|--------|--------|
| 360.1807  | 1 | C <sub>20</sub> H <sub>26</sub> NO <sub>5</sub>   | 360.1805 | -0.5      | 14.7   | 1        | 100.00 | 8.5 | even           |      | ok     | M+H    |
| 382.1629  | 1 | C <sub>20</sub> H <sub>25</sub> NNaO <sub>5</sub> | 382.1625 | -1.0      | 27.1   | 1        | 100.00 | 8.5 | even           |      | ok     | M+Na   |

STSD-V\_RB4\_01\_3978.d

Bruker Compass DataAnalysis 4.2

printed: 7/5/2017 9:37:53 PM

by: CIF

Page 1 of 1



### FTIR (Table 6, Entry 6)

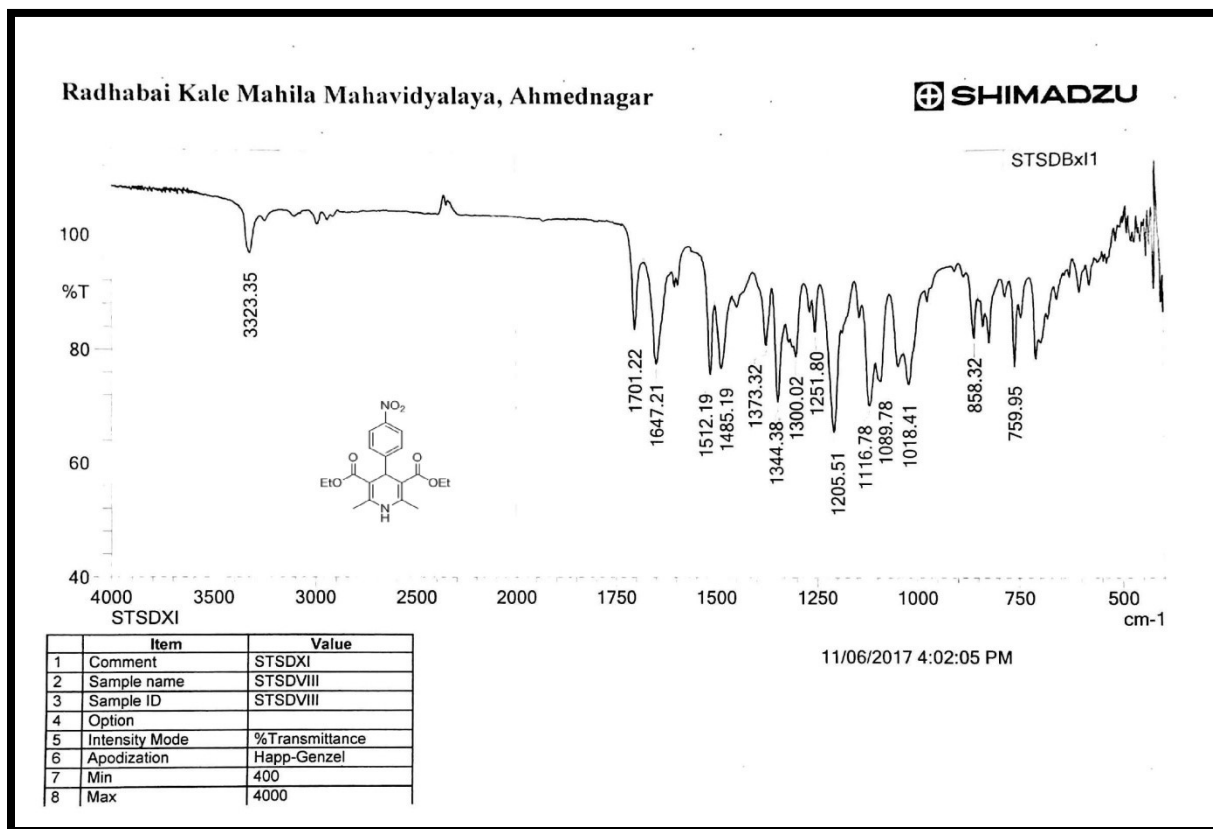

# <sup>1</sup>H-NMR spectra (Table 6, Entry 6)

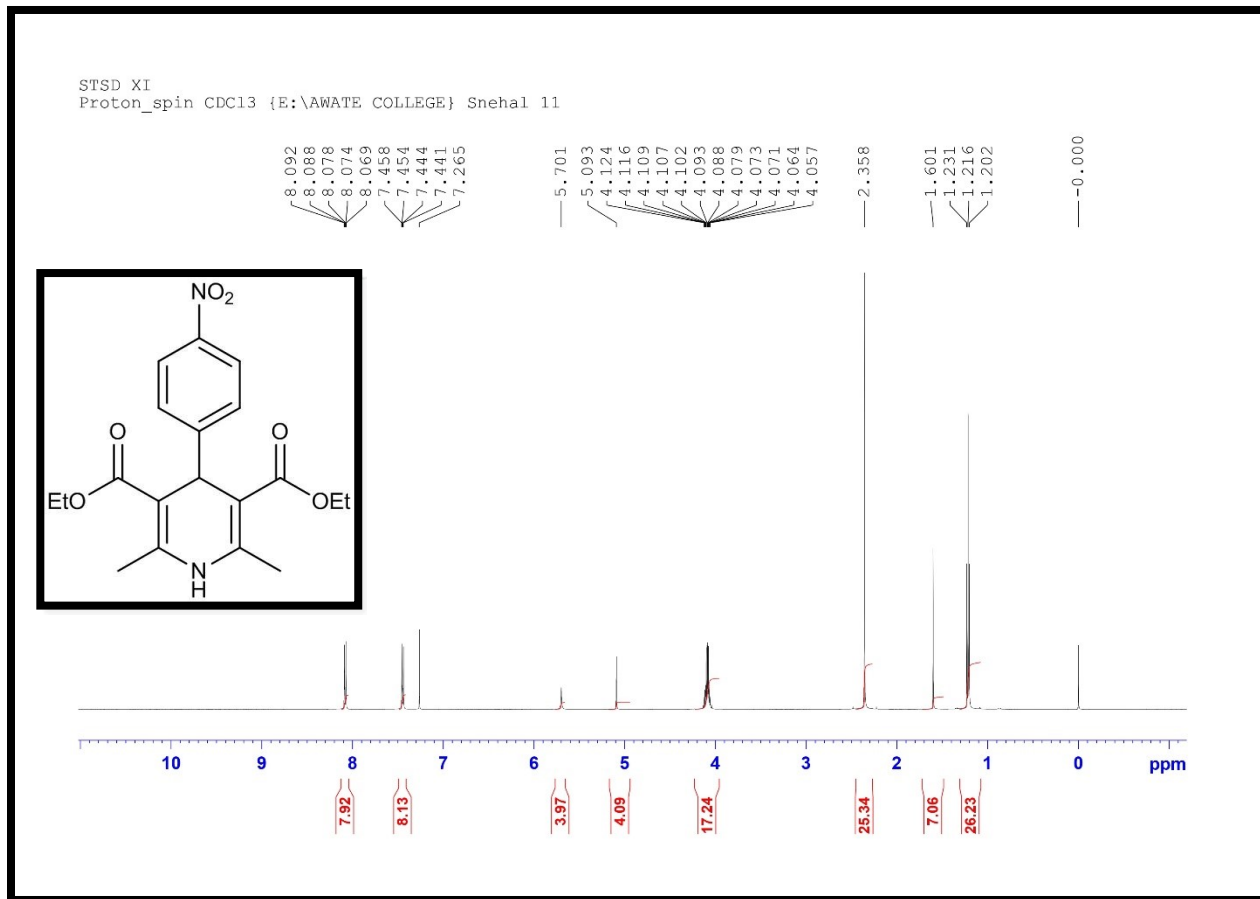

### <sup>13</sup>C-NMR spectra (Table 6, Entry 6)

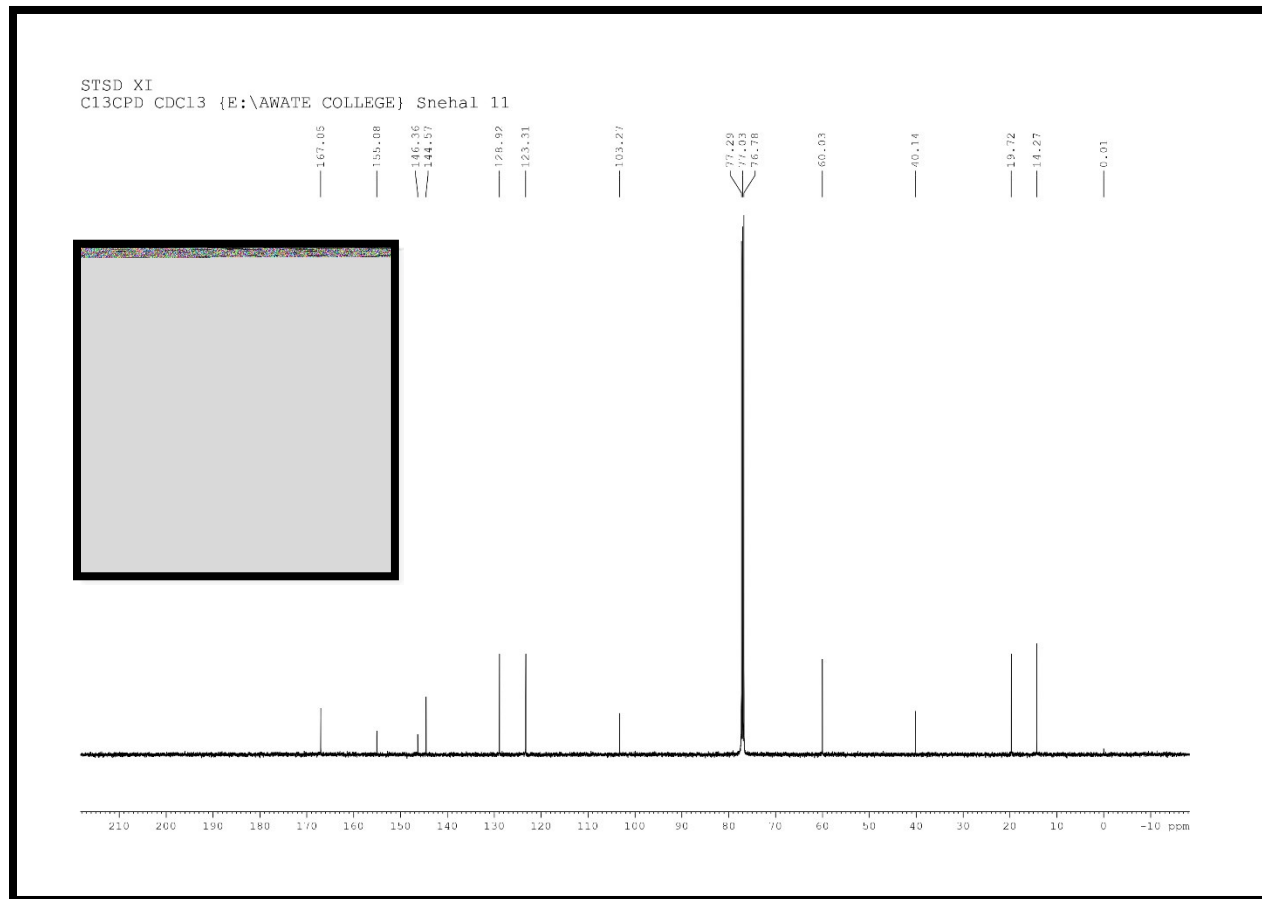

## HRMS (Table 6, Entry 6)

---

### Savitribai Phule Pune University - Central Instrumentation Facility

---

|                      |                                                                                                       |                                      |                         |
|----------------------|-------------------------------------------------------------------------------------------------------|--------------------------------------|-------------------------|
| <b>Analysis Info</b> |                                                                                                       | Acquisition Date 7/5/2017 8:30:47 PM |                         |
| Analysis Name        | D:\Data\2017\JUNE\SPPU AFFILIATED\VA AWATE COLLEGE, MANCHAR\KG KANADE\DB BANKAR\STSD-XI_RB7_01_3981.d |                                      |                         |
| Method               | dlc-ms600mz_10min.m                                                                                   | Operator                             | CIF                     |
| Sample Name          | STSD-XI                                                                                               | Instrument                           | impact HD 1819696.00184 |
| Comment              |                                                                                                       |                                      |                         |

|                              |         |                      |          |                  |           |
|------------------------------|---------|----------------------|----------|------------------|-----------|
| <b>Acquisition Parameter</b> |         |                      |          |                  |           |
| Source Type                  | ESI     | Ion Polarity         | Positive | Set Nebulizer    | 0.3 Bar   |
| Focus                        | Active  | Set Capillary        | 3500 V   | Set Dry Heater   | 200 °C    |
| Scan Begin                   | 50 m/z  | Set End Plate Offset | -500 V   | Set Dry Gas      | 4.0 l/min |
| Scan End                     | 600 m/z | Set Charging Voltage | 2000 V   | Set Divert Valve | Waste     |
|                              |         | Set Corona           | 0 nA     | Set APCI Heater  | 0 °C      |

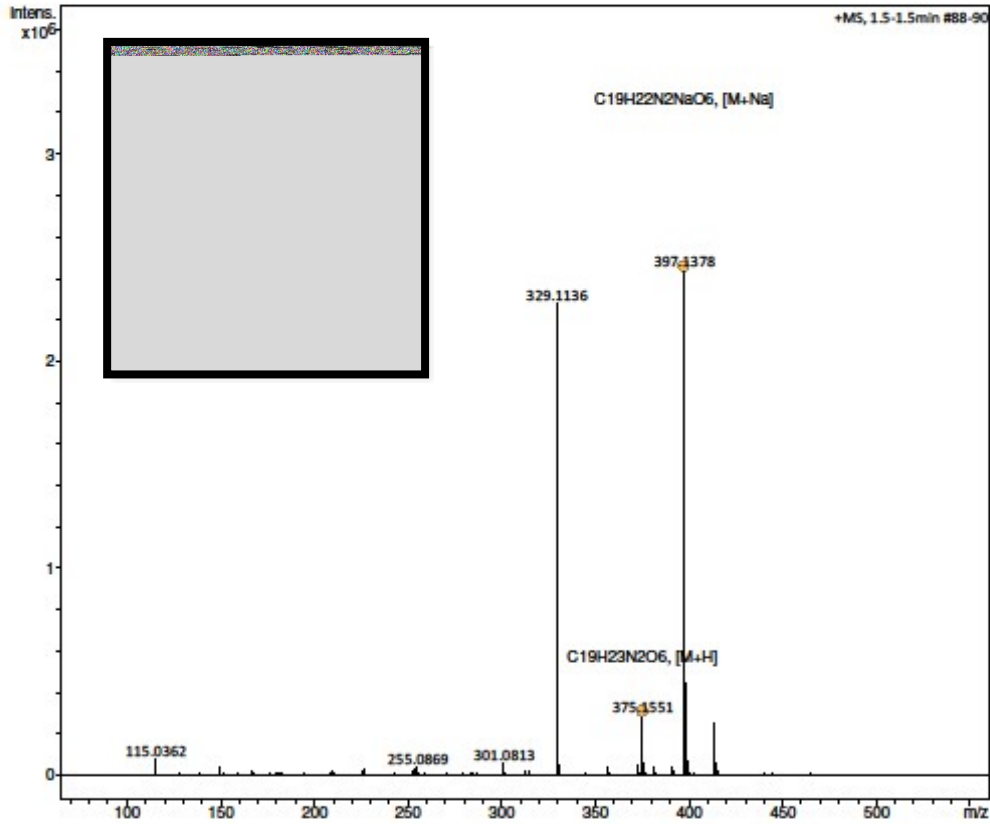

| Meas. m/z | # | Ion Formula                                                     | m/z      | err [ppm] | mSigma | # mSigma | Score  | rdb | e <sup>-</sup> | Conf | N-Rule | Adduct |
|-----------|---|-----------------------------------------------------------------|----------|-----------|--------|----------|--------|-----|----------------|------|--------|--------|
| 375.1551  | 1 | C <sub>19</sub> H <sub>23</sub> N <sub>2</sub> O <sub>6</sub>   | 375.1551 | -0.0      | 3.4    | 1        | 100.00 | 9.5 | even           |      | ok     | M+H    |
| 397.1378  | 1 | C <sub>19</sub> H <sub>22</sub> N <sub>2</sub> NaO <sub>6</sub> | 397.1370 | -1.9      | 20.8   | 1        | 100.00 | 9.5 | even           |      | ok     | M+Na   |

STSD-XI\_RB7\_01\_3981.d

Bruker Compass DataAnalysis 4.2

printed: 7/5/2017 10:28:51 PM

by: CIF

Page 1 of 1

### FTIR (Table 6, Entry 7)

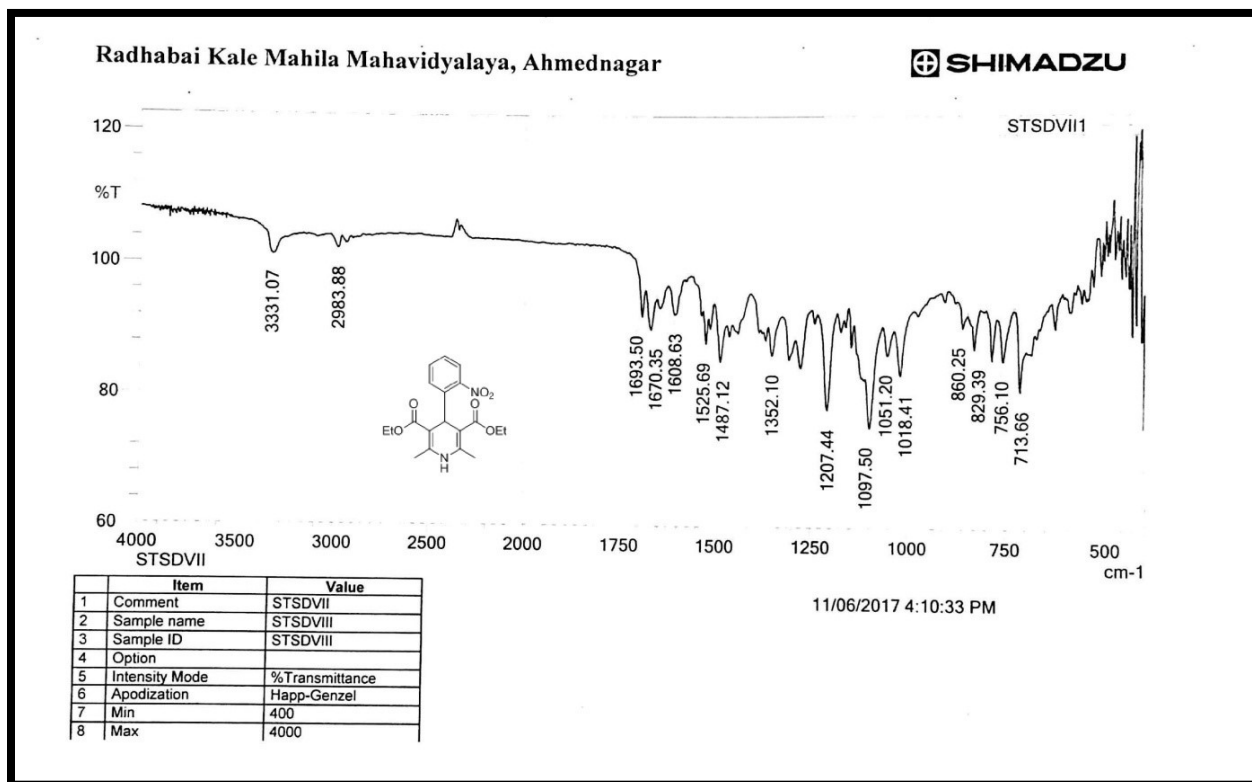

# <sup>1</sup>H-NMR spectra (Table 6, Entry 7)

STSD VII  
Proton\_spin CDCl<sub>3</sub>

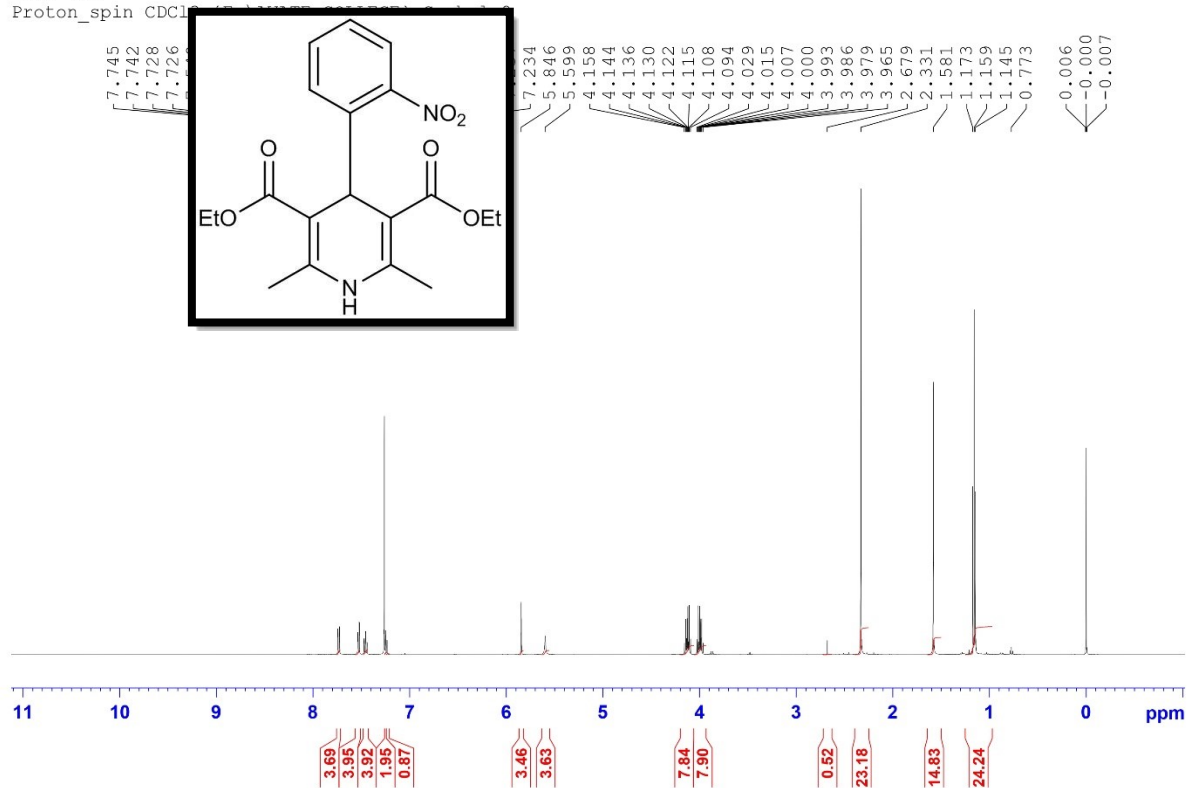

# <sup>13</sup>C-NMR spectra (Table 6, Entry 7)

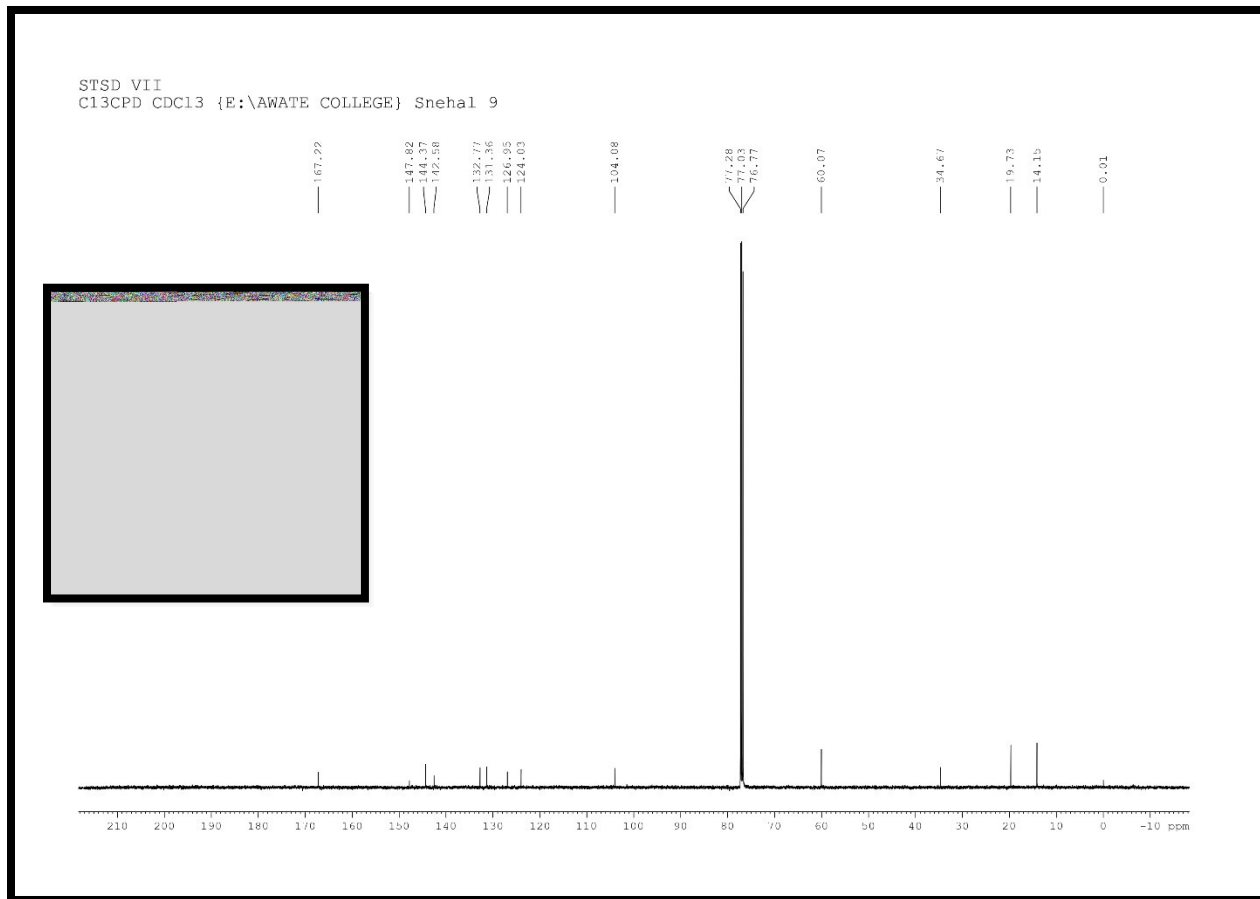

# HRMS (Table 6, Entry 7)

## Savitribai Phule Pune University - Central Instrumentation Facility

|                      |                                                                                                        |                                      |                         |
|----------------------|--------------------------------------------------------------------------------------------------------|--------------------------------------|-------------------------|
| <b>Analysis Info</b> |                                                                                                        | Acquisition Date 7/5/2017 8:09:14 PM |                         |
| Analysis Name        | D:\Data\2017\JUNE\SPPU AFFILIATED\VA AWATE COLLEGE, MANCHAR\KG KANADE\DB BANKAR\STSD-VII_RB5_01_3979.d |                                      |                         |
| Method               | dlc-ms600mz_10min.m                                                                                    | Operator                             | CIF                     |
| Sample Name          | STSD-VII                                                                                               | Instrument                           | impact HD 1819696.00184 |
| Comment              |                                                                                                        |                                      |                         |

|                              |         |                      |          |                  |           |
|------------------------------|---------|----------------------|----------|------------------|-----------|
| <b>Acquisition Parameter</b> |         |                      |          |                  |           |
| Source Type                  | ESI     | Ion Polarity         | Positive | Set Nebulzer     | 0.3 Bar   |
| Focus                        | Active  | Set Capillary        | 3500 V   | Set Dry Heater   | 200 °C    |
| Scan Begin                   | 50 m/z  | Set End Plate Offset | -500 V   | Set Dry Gas      | 4.0 l/min |
| Scan End                     | 600 m/z | Set Charging Voltage | 2000 V   | Set Divert Valve | Waste     |
|                              |         | Set Corona           | 0 nA     | Set APCI Heater  | 0 °C      |

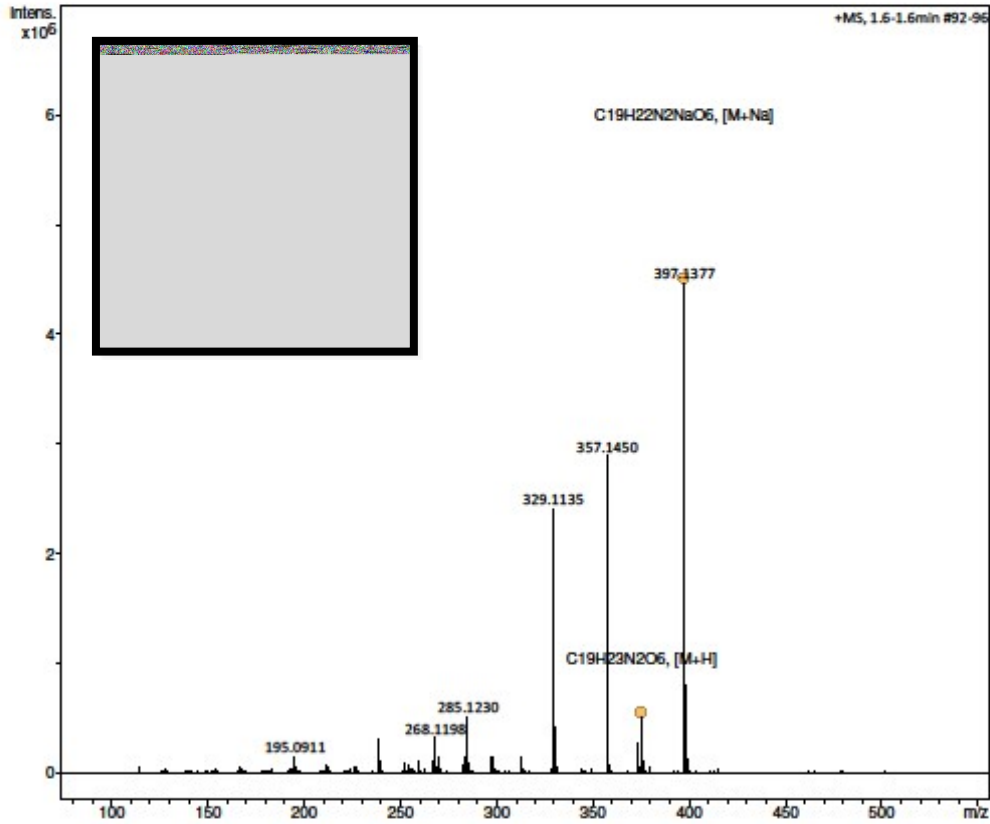

| Meas. m/z | # | Ion Formula  | m/z      | err [ppm] | mSigma | # mSigma | Score  | rdb | e <sup>-</sup> | Conf | N-Rule | Adduct |
|-----------|---|--------------|----------|-----------|--------|----------|--------|-----|----------------|------|--------|--------|
| 375.1550  | 1 | C19H23N2O6   | 375.1551 | 0.2       | 7.8    | 1        | 100.00 | 9.5 | even           |      | ok     | M+H    |
| 397.1377  | 1 | C19H22N2NaO6 | 397.1370 | -1.8      | 22.4   | 1        | 100.00 | 9.5 | even           |      | ok     | M+Na   |



### FTIR (Table 6, Entry 8)

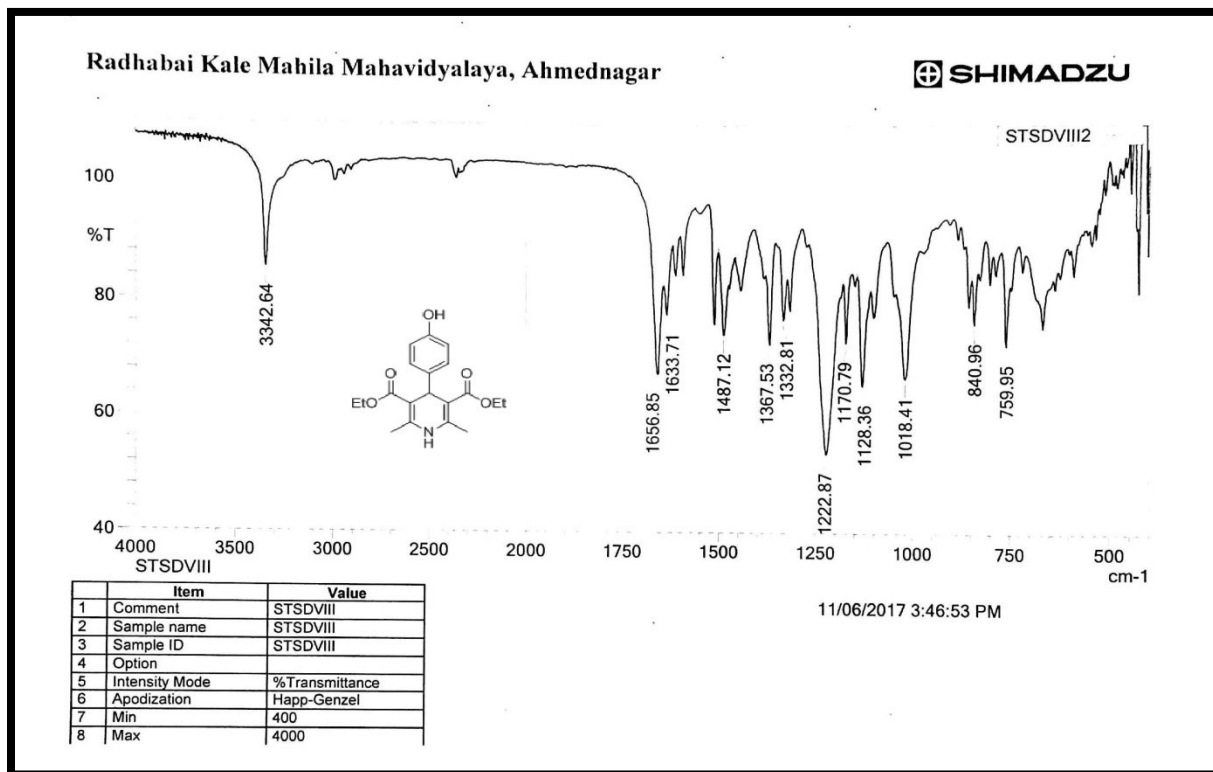

# <sup>1</sup>H-NMR spectra (Table 6, Entry 8)

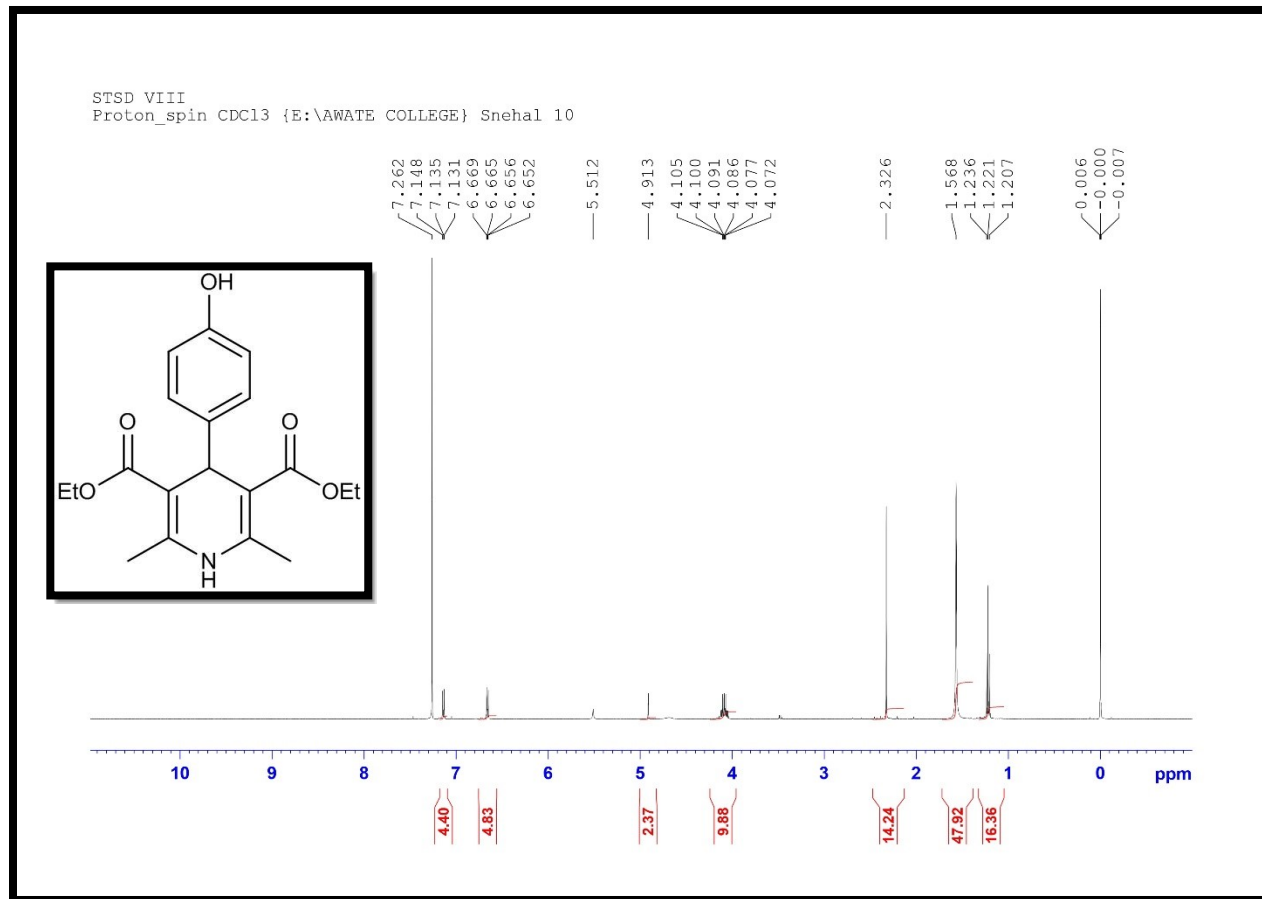

## HRMS (Table 6, Entry 8)

---

### Savitribai Phule Pune University - Central Instrumentation Facility

---

|                      |                                                                                                         |                                      |                         |
|----------------------|---------------------------------------------------------------------------------------------------------|--------------------------------------|-------------------------|
| <b>Analysis Info</b> |                                                                                                         | Acquisition Date 7/5/2017 8:20:07 PM |                         |
| Analysis Name        | D:\Data\2017\JUNE\SPPU AFFILIATED\VA AWATE COLLEGE, MANCHAR\KG KANADE\DB BANKAR\STSD-VIII_RB6_01_3980.d |                                      |                         |
| Method               | dlc-ms600mz_10min.m                                                                                     | Operator                             | CIF                     |
| Sample Name          | STSD-VIII                                                                                               | Instrument                           | impact HD 1819696.00184 |
| Comment              |                                                                                                         |                                      |                         |

|                              |         |                      |          |                  |           |
|------------------------------|---------|----------------------|----------|------------------|-----------|
| <b>Acquisition Parameter</b> |         |                      |          |                  |           |
| Source Type                  | ESI     | Ion Polarity         | Positive | Set Nebulzer     | 0.3 Bar   |
| Focus                        | Active  | Set Capillary        | 3500 V   | Set Dry Heater   | 200 °C    |
| Scan Begin                   | 50 m/z  | Set End Plate Offset | -500 V   | Set Dry Gas      | 4.0 l/min |
| Scan End                     | 600 m/z | Set Charging Voltage | 2000 V   | Set Divert Valve | Waste     |
|                              |         | Set Corona           | 0 nA     | Set APCI Heater  | 0 °C      |

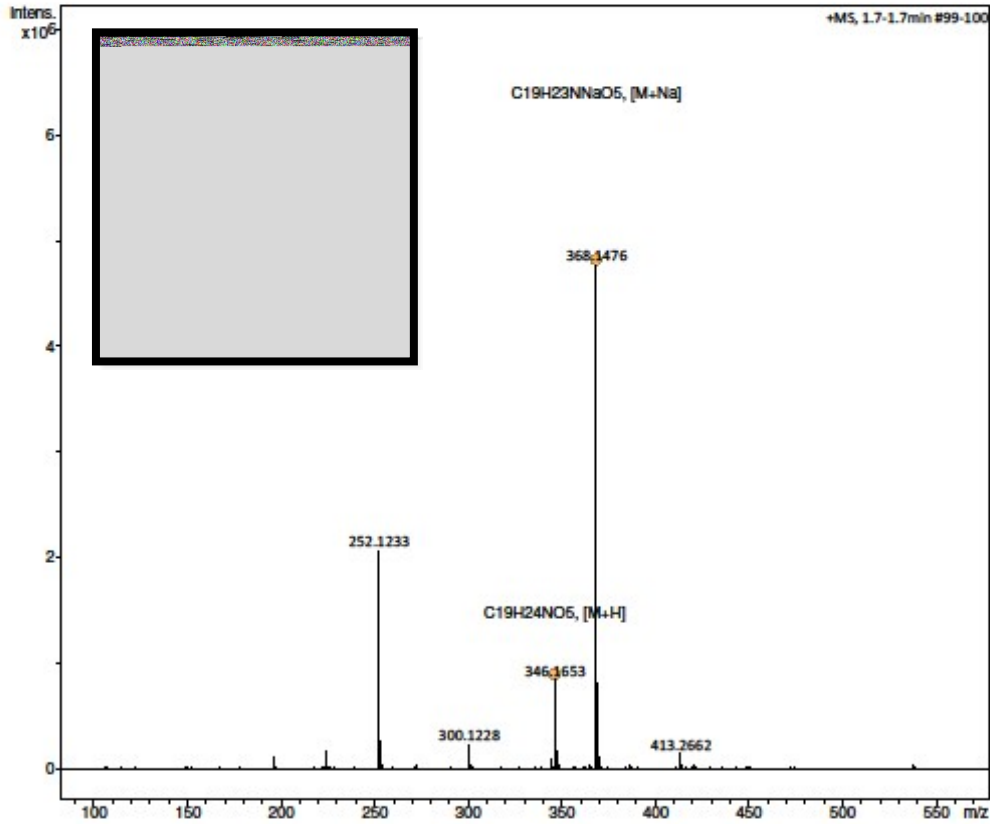

| Meas. m/z | # | Ion Formula | m/z      | err [ppm] | mSigma | # | mSigma | Score | rdB  | e <sup>-</sup> | Conf | N-Rule | Adduct |
|-----------|---|-------------|----------|-----------|--------|---|--------|-------|------|----------------|------|--------|--------|
| 346.1653  | 1 | C19H24NO5   | 346.1649 | -1.0      | 7.0    | 1 | 100.00 | 8.5   | even |                |      | ok     | M+H    |
| 368.1476  | 1 | C19H23NNaO5 | 368.1468 | -2.2      | 25.1   | 1 | 100.00 | 8.5   | even |                |      | ok     | M+Na   |

### FTIR (Table 6, Entry 9)

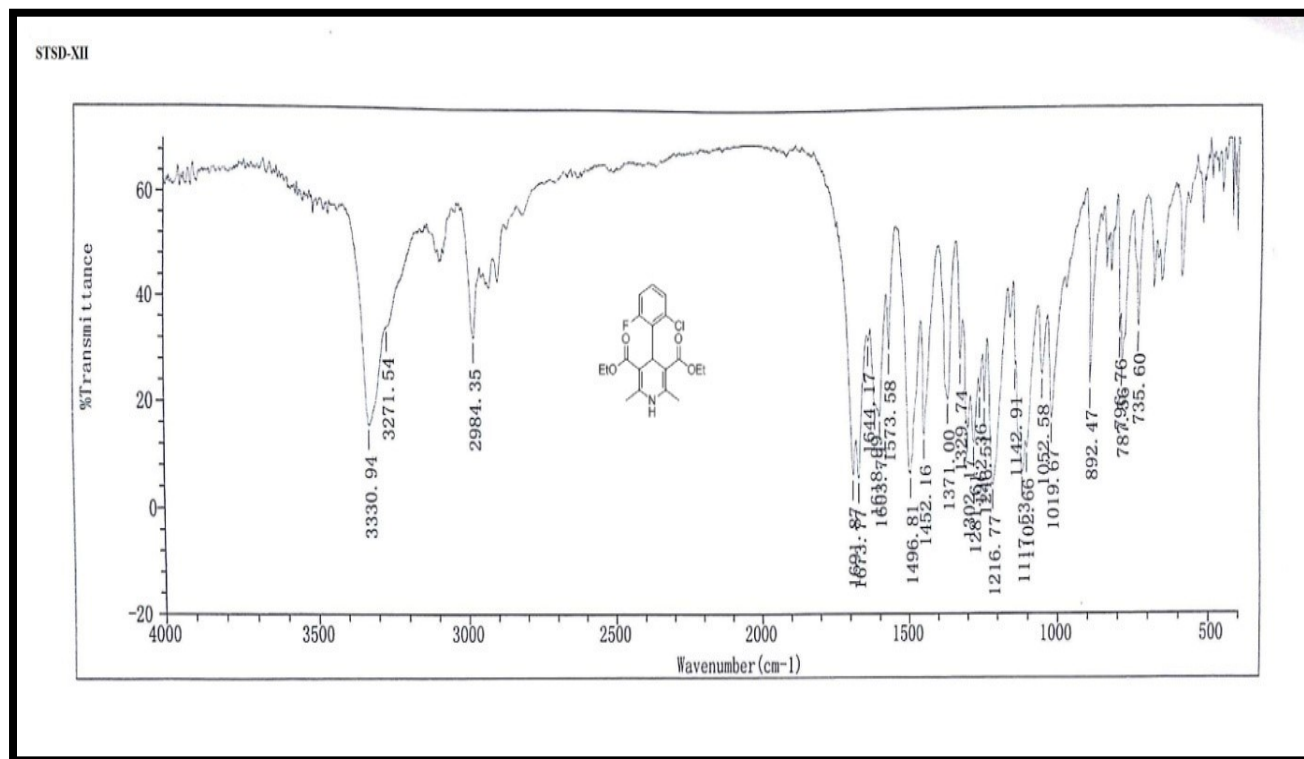

# <sup>1</sup>H-NMR spectra (Table 6, Entry 9)

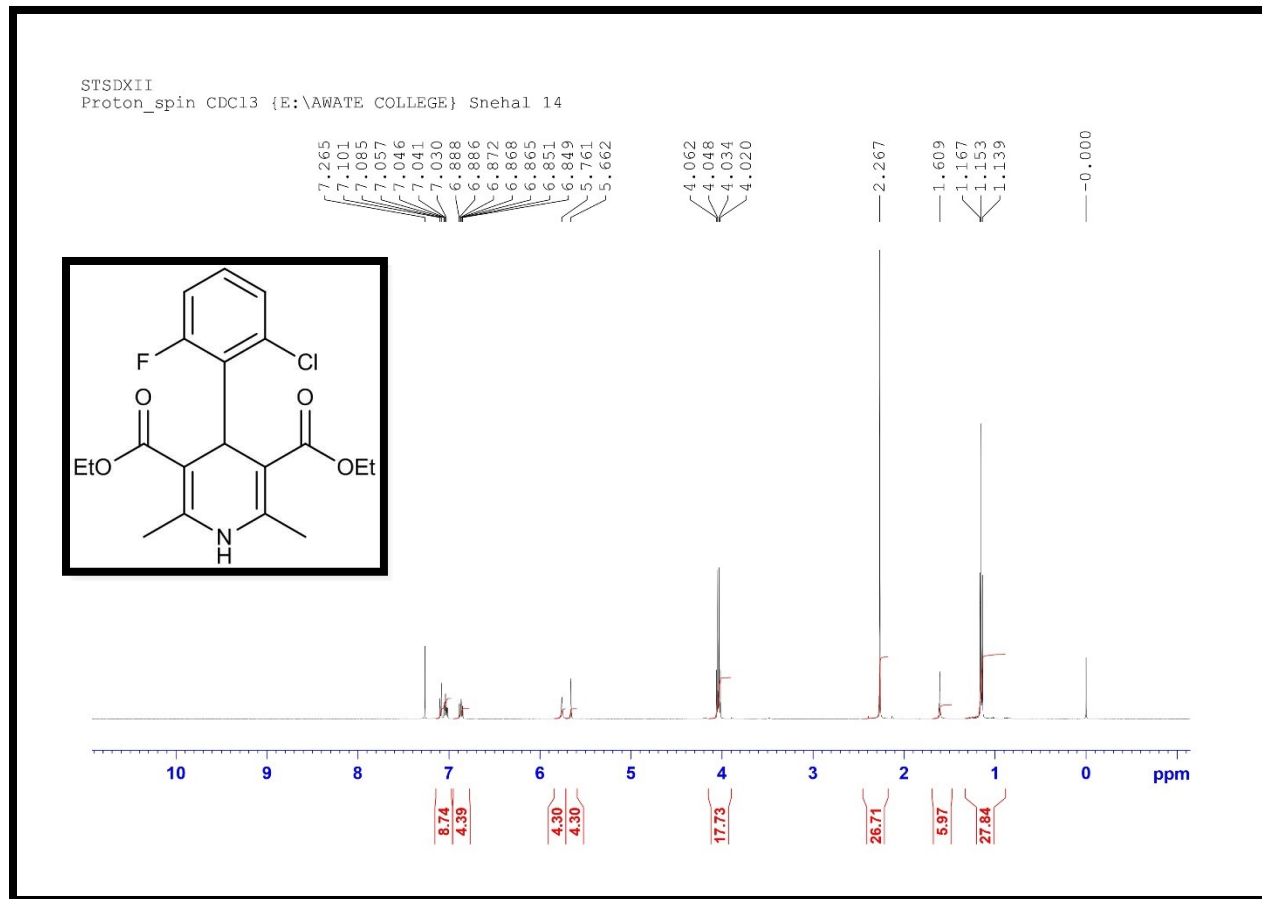

### <sup>13</sup>C-NMR spectra (Table 6, Entry 9)

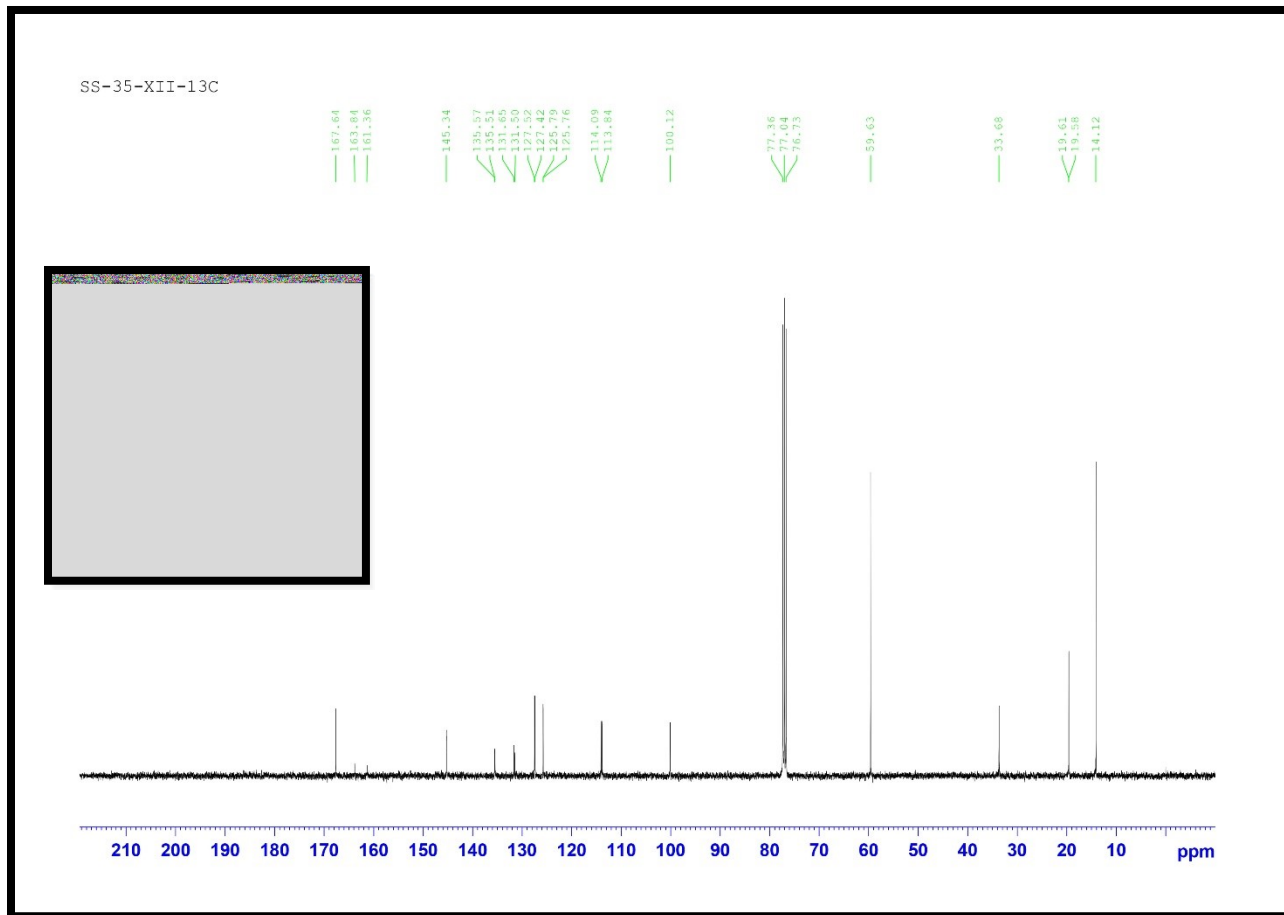

# <sup>13</sup>C-NMR Expansion image (Table 6, Entry 9)

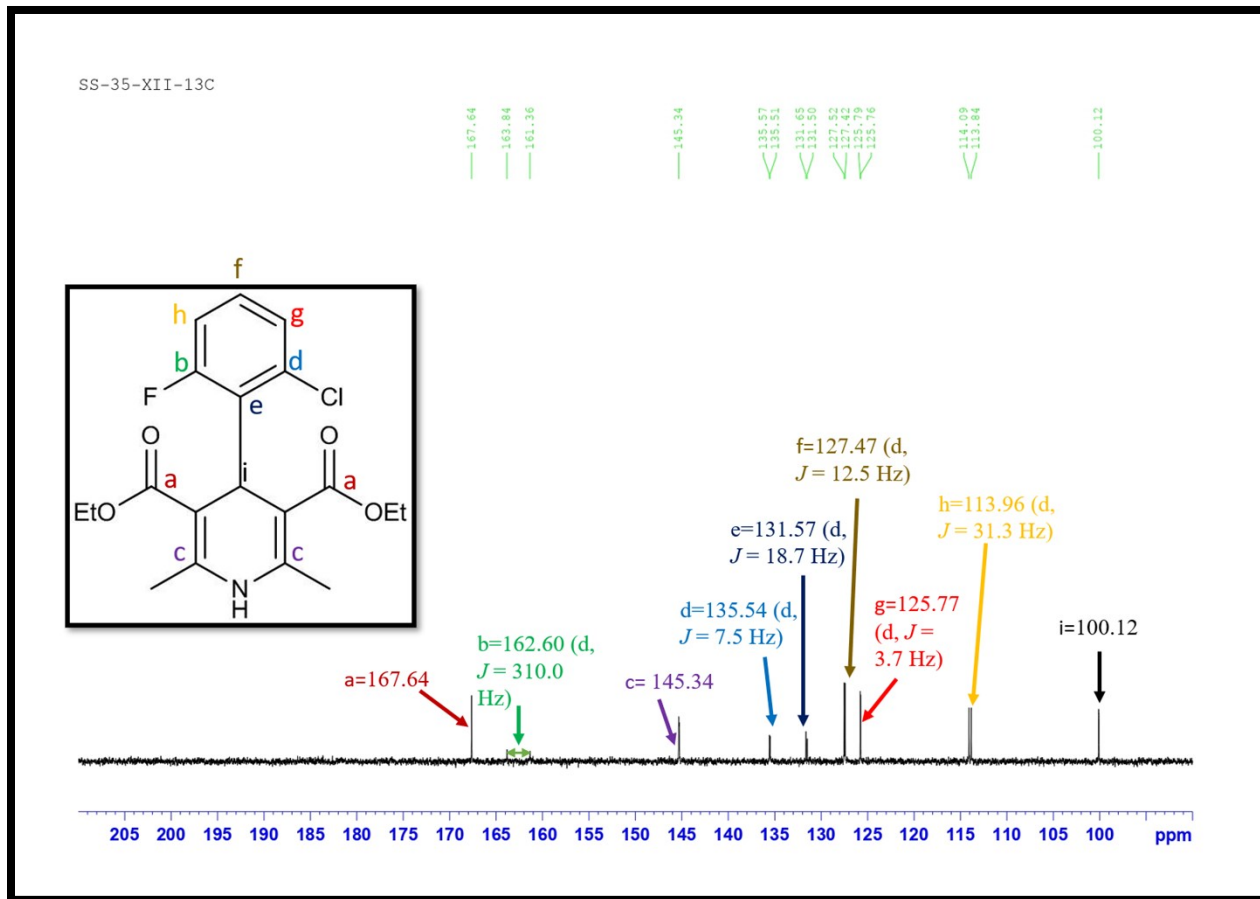

## HRMS (Table 6, Entry 9)

---

### Savitribai Phule Pune University - Central Instrumentation Facility

---

|                      |                                                                                                        |                                      |                         |
|----------------------|--------------------------------------------------------------------------------------------------------|--------------------------------------|-------------------------|
| <b>Analysis Info</b> |                                                                                                        | Acquisition Date 7/5/2017 8:41:30 PM |                         |
| Analysis Name        | D:\Data\2017\JUNE\SPPU AFFILIATED\VA AWATE COLLEGE, MANCHAR\KG KANADE\DB BANKAR\STSD-XII_RB8_01_3982.d |                                      |                         |
| Method               | dlc-ms600mz_10min.m                                                                                    | Operator                             | CIF                     |
| Sample Name          | STSD-XII                                                                                               | Instrument                           | impact HD 1819696.00184 |
| Comment              |                                                                                                        |                                      |                         |

|                              |         |                      |          |                  |           |
|------------------------------|---------|----------------------|----------|------------------|-----------|
| <b>Acquisition Parameter</b> |         |                      |          |                  |           |
| Source Type                  | ESI     | Ion Polarity         | Positive | Set Nebulizer    | 0.3 Bar   |
| Focus                        | Active  | Set Capillary        | 3500 V   | Set Dry Heater   | 200 °C    |
| Scan Begin                   | 50 m/z  | Set End Plate Offset | -500 V   | Set Dry Gas      | 4.0 l/min |
| Scan End                     | 600 m/z | Set Charging Voltage | 2000 V   | Set Divert Valve | Waste     |
|                              |         | Set Corona           | 0 nA     | Set APCI Heater  | 0 °C      |

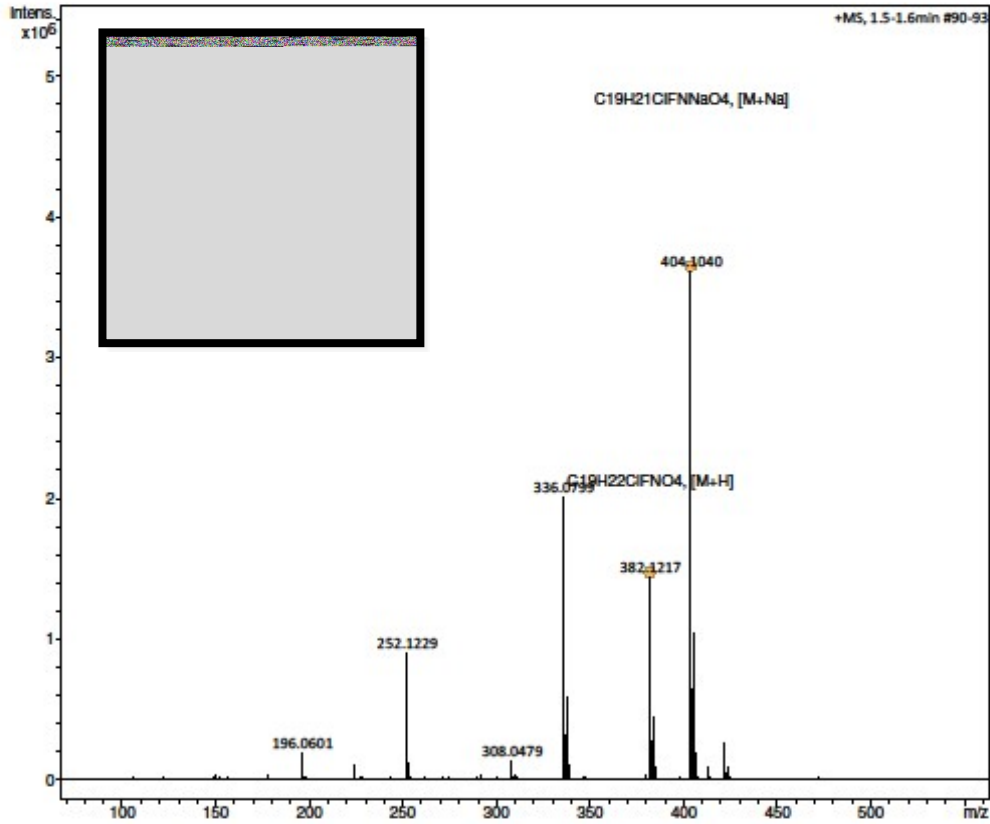

| Meas. m/z | # | Ion Formula    | m/z      | err [ppm] | mSigma | # mSigma | Score  | rdb | e <sup>-</sup> | Conf | N-Rule | Adduct |
|-----------|---|----------------|----------|-----------|--------|----------|--------|-----|----------------|------|--------|--------|
| 382.1217  | 1 | C19H22ClFNO4   | 382.1216 | -0.4      | 19.1   | 1        | 100.00 | 8.5 | even           |      | ok     | M+H    |
| 404.1040  | 1 | C19H21ClFNNaO4 | 404.1035 | -1.2      | 32.7   | 1        | 100.00 | 8.5 | even           |      | ok     | M+Na   |

STSD-XII\_RB8\_01\_3982.d

Bruker Compass DataAnalysis 4.2

printed: 7/5/2017 10:33:25 PM

by: CIF

Page 1 of 1
